# Supplementary material for: Effects of the terminal donor unit in dyes with D–D–π–A architecture on the regeneration mechanism in DSSCs: a computational study
Source: Royal Society of Chemistry journal article supplement (doi:10.1039/c8cp03821j), 2018-01-01
Supplement: c8cp03821j1.pdf [file c8cp03821j1.pdf]

## Supplementary Information (SI)

### Effects of Terminal Donor Unit in Dyes with D–D– $\pi$ –A Architecture on the Regeneration Mechanism in DSSCs: A Computational Study

Yohannes Mulugeta Hailu,<sup>†</sup> Minh Tho Nguyen<sup>\*‡</sup> and Jyh-Chiang Jiang<sup>\*†</sup>

<sup>†</sup> Department of Chemical Engineering, National Taiwan University of Science and Technology, Taipei, Taiwan, ROC: Email: [jcjiang@mail.ntust.edu.tw](mailto:jcjiang@mail.ntust.edu.tw)

<sup>‡</sup> Institute for Computational Science and Technology (ICST), Ho Chi Minh City, Vietnam, and Department of Chemistry, KU Leuven, –B-3001 Leuven, Belgium: Email: [minh.nguyen@kuleuven.be](mailto:minh.nguyen@kuleuven.be)

## List of Figures

|                                                                                                                                                                                                                                                                                                                                            |     |
|--------------------------------------------------------------------------------------------------------------------------------------------------------------------------------------------------------------------------------------------------------------------------------------------------------------------------------------------|-----|
| <b>Figure S 1.</b> The optimized structure of the selected bond lengths ( $r$ in Å) and dihedral angles ( $\Phi$ in °) for triphenylamine-based D- $\pi$ -A organic dyes. Labeling R denotes the different donor substituents. ....                                                                                                        | S5  |
| <b>Figure S 2.</b> Schematic representation plots of ionization potential (IP) versus HOMO energy levels of the designed dyes along the reference dye. ....                                                                                                                                                                                | S5  |
| <b>Figure S 3.</b> Schematic of internal reorganization energy for hole/electron transfer.[2, 3] .....                                                                                                                                                                                                                                     | S6  |
| <b>Figure S 4.</b> Schematic representation of thermodynamic cycle used to calculate the reduction potentials of the designed dyes and iodide ion.[4] .....                                                                                                                                                                                | S6  |
| <b>Figure S 5.</b> The optimized geometries of A) [dyeI] <sup>-</sup> B) [dyeI] <sup>*</sup> , and C) [dyeI <sub>2</sub> ] <sup>*-</sup> dye-iodide complexes of the <b>dye2</b> sensitizer. The color scheme adopted is gray, white, blue, red, yellow and purple for C, H, N, O, S, and I atoms, respectively. ....                      | S7  |
| <b>Figure S 6.</b> The optimized geometries of A) [dyeI] <sup>-</sup> B) [dyeI] <sup>*</sup> , and C) [dyeI <sub>2</sub> ] <sup>*-</sup> dye-iodide complexes of the designed <b>dye3</b> sensitizer. The color scheme is gray, white, blue, red, yellow and purple for C, H, N, O, S, and I atoms, respectively. ....                     | S8  |
| <b>Figure S 7.</b> The optimized geometries of A) [dyeI] <sup>-</sup> B) [dyeI] <sup>*</sup> , and C) [dyeI <sub>2</sub> ] <sup>*-</sup> dye-Iodide complexes of the designed <b>dye4</b> sensitizer. The color scheme is gray, white, blue, red, yellow and purple for C, H, N, O, S, and I atoms, respectively. ....                     | S9  |
| <b>Figure S 8.</b> The optimized geometries of A) [dyeI] <sup>-</sup> B) [dyeI] <sup>*</sup> , and C) [dyeI <sub>2</sub> ] <sup>*-</sup> dye-iodide complexes of the designed <b>dye5</b> sensitizer. The color scheme is gray, white, blue, red, yellow and purple for C, H, N, O, S, and I atoms, respectively. ....                     | S10 |
| <b>Figure S 9.</b> Calculated isosurface plots of the spin density distribution of the radicaloid intermediate [dye <sup>•+</sup> ] and [dyeI] <sup>*</sup> for the investigated sensitizers. ....                                                                                                                                         | S11 |
| <b>Figure S 10.</b> The Schematic representaion of the geometries for the recombination reactions [dye <sup>•+</sup> ...I <sup>-</sup> ...I <sup>-</sup> ] of the most stable intermediate of [dyeI <sub>2</sub> ] <sup>*-</sup> complexes of a) dye1, b) dye3, and c) the diiodide radicaloid anion (I <sub>2</sub> <sup>•-</sup> ). .... | S12 |
| <b>Figure S 11.</b> Calculated isodensity plots of the selected frontier moleculer orbitals of A) [dyeI] <sup>-</sup> B) [dyeI] <sup>*</sup> , and C) [dyeI <sub>2</sub> ] <sup>*-</sup> complexes of the designed <b>dye2</b> sensitizer at different iodide interaction sites (Isovalue is 0.02 a.u.). ....                              | S15 |

|                                                                                                                                                                                                                                                                                                          |     |
|----------------------------------------------------------------------------------------------------------------------------------------------------------------------------------------------------------------------------------------------------------------------------------------------------------|-----|
| <b>Figure S 12.</b> Calculated isodensity plots of the selected frontier molecular orbitals of A) [dyeI] <sup>-</sup> B) [dyeI] <sup>*</sup> , and C) [dyeI <sub>2</sub> ] <sup>*-</sup> complexes of the designed <b>dye3</b> sensitizer at different iodide interaction sites (Isovalue is 0.02 a.u.). | S18 |
| <b>Figure S 13.</b> Calculated isodensity plots of the selected frontier molecular orbitals of A) [dyeI] <sup>-</sup> B) [dyeI] <sup>*</sup> , and C) [dyeI <sub>2</sub> ] <sup>*-</sup> complexes of the designed <b>dye4</b> sensitizer at different iodide interaction sites (Isovalue is 0.02 a.u.). | S21 |
| <b>Figure S 14.</b> Calculated isodensity plots of the selected frontier molecular orbitals of A) [dyeI] <sup>-</sup> B) [dyeI] <sup>*</sup> , and C) [dyeI <sub>2</sub> ] <sup>*-</sup> complexes of the designed <b>dye5</b> sensitizer at different iodide interaction sites (Isovalue is 0.02 a.u.). | S24 |

### List of Tables

|                                                                                                                                                                                                                                                                                                         |     |
|---------------------------------------------------------------------------------------------------------------------------------------------------------------------------------------------------------------------------------------------------------------------------------------------------------|-----|
| <b>Table S 1.</b> Simulated UV-Vis absorption wavelength ( $\lambda$ in nm) for L1, L2[5] and TT2A[6] organic dyes with different DFT functional.                                                                                                                                                       | S25 |
| <b>Table S 2.</b> The selected bond lengths (in Å) and dihedral angles (in °) for the D–D– $\pi$ –A organic dyes.                                                                                                                                                                                       | S26 |
| <b>Table S 3.</b> Calculated atomic charges from NBO Method <sup>a</sup> and the condensed Fukui functions ( $f^+$ ) <sup>b</sup> values (for nucleophilic attack).                                                                                                                                     | S27 |
| <b>Table S 4.</b> Calculated relative Gibbs free energies ( $\Delta G_{rel}$ in kcal/mol) and the corresponding NBO charges for the [dyeI] <sup>-</sup> , [dyeI] <sup>*</sup> and [dyeI <sub>2</sub> ] <sup>*-</sup> intermediates complexes of the different donor groups of the designed sensitizers. | S31 |
| <b>Table S 5.</b> Calculated absorption wavelength ( $\lambda$ in nm), oscillator strengths ( $f$ in a.u.), light harvesting efficiency (LHE), and the corresponding transitions assignments of the dye-iodide complexes.                                                                               | S33 |
| <b>Table S 6.</b> Calculated absorption wavelength ( $\lambda$ in nm), oscillator strengths ( $f$ in a.u.), light harvesting efficiency (LHE), and the corresponding electronic transition of the dye-iodide [dyeI <sub>2</sub> ] <sup>*-</sup> complexes for all the designed sensitizers.             | S35 |

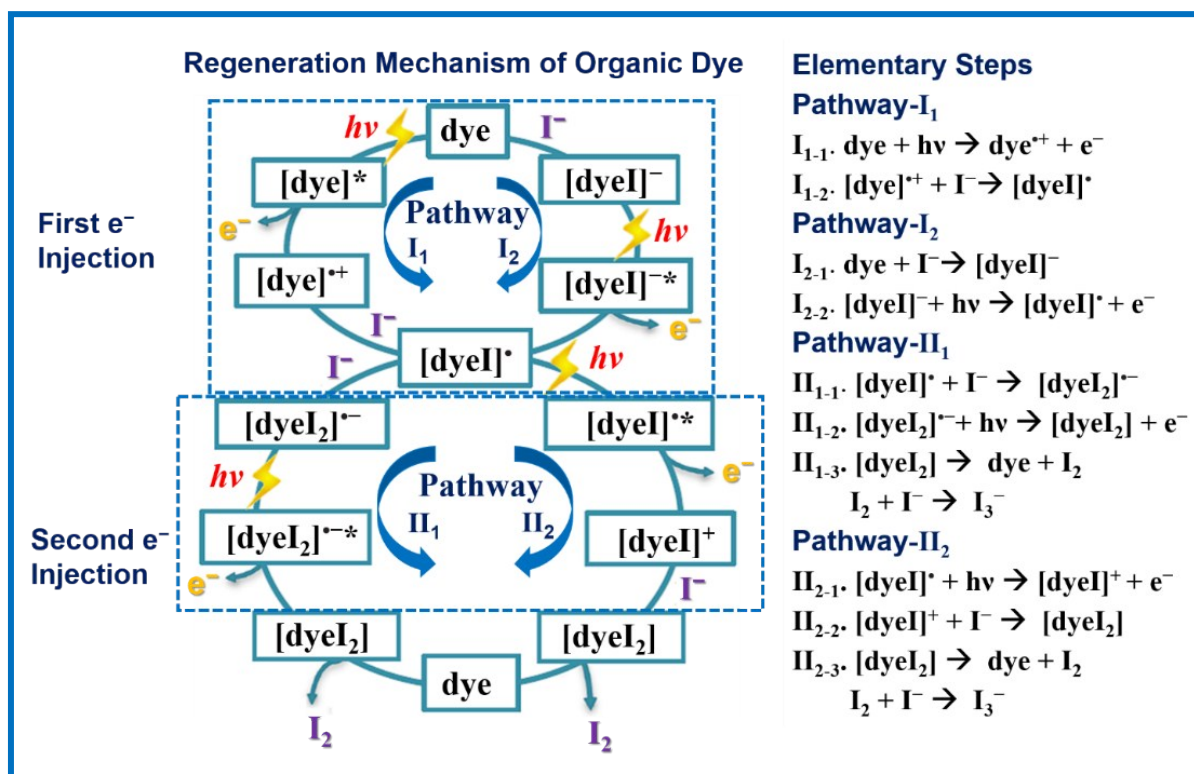

**Scheme S 1.** Proposed mechanisms for organic dye regeneration. Taken from ref.<sup>1</sup>

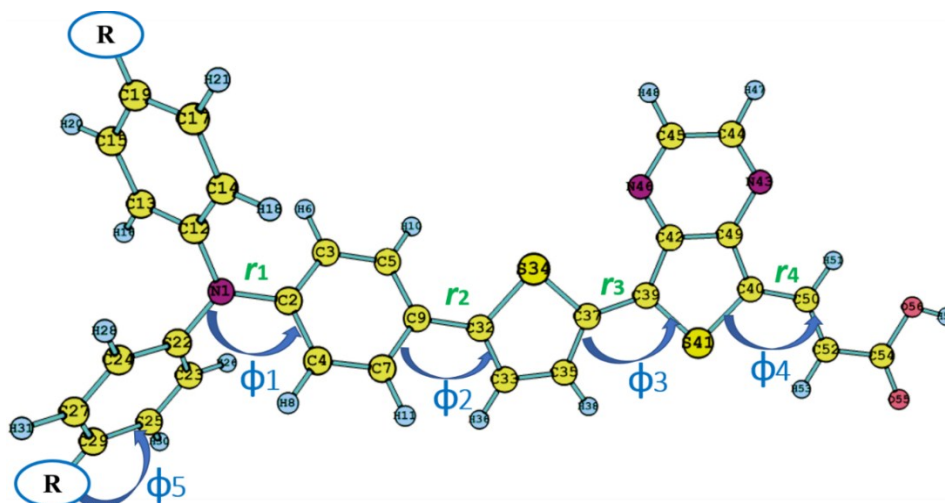

**Figure S 1.** The optimized structure of the selected bond lengths ( $r$  in Å) and dihedral angles ( $\Phi$  in  $^\circ$ ) for triphenylamine-based D- $\pi$ -A organic dyes. Labeling R denotes the different donor substituents.

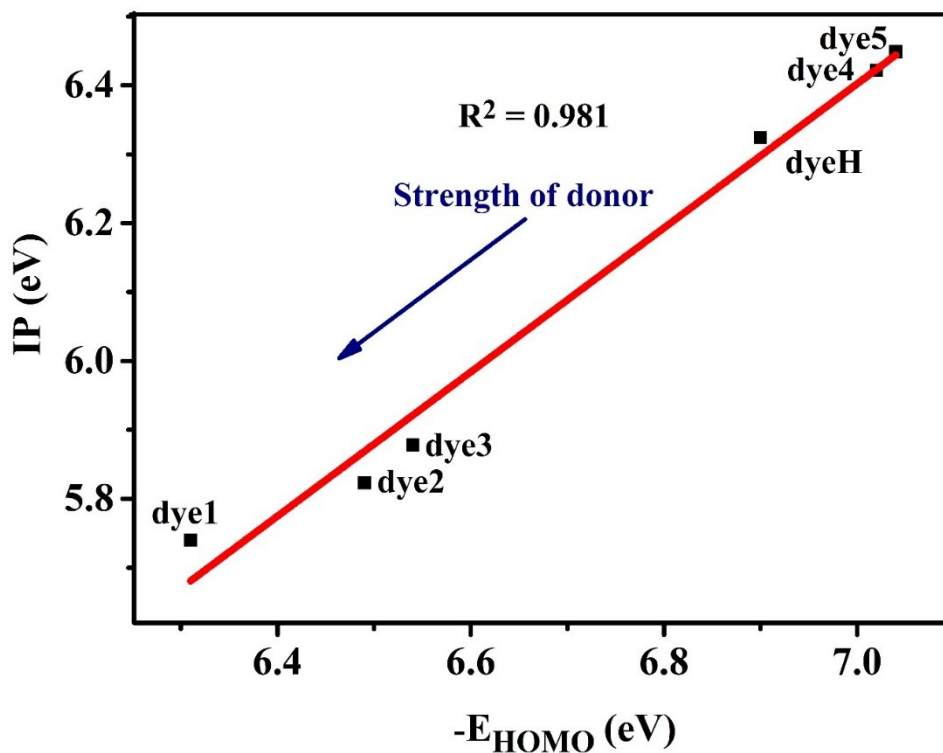

**Figure S 2.** Schematic representation plots of ionization potential (IP) versus HOMO energy levels of the designed dyes along the reference dye.

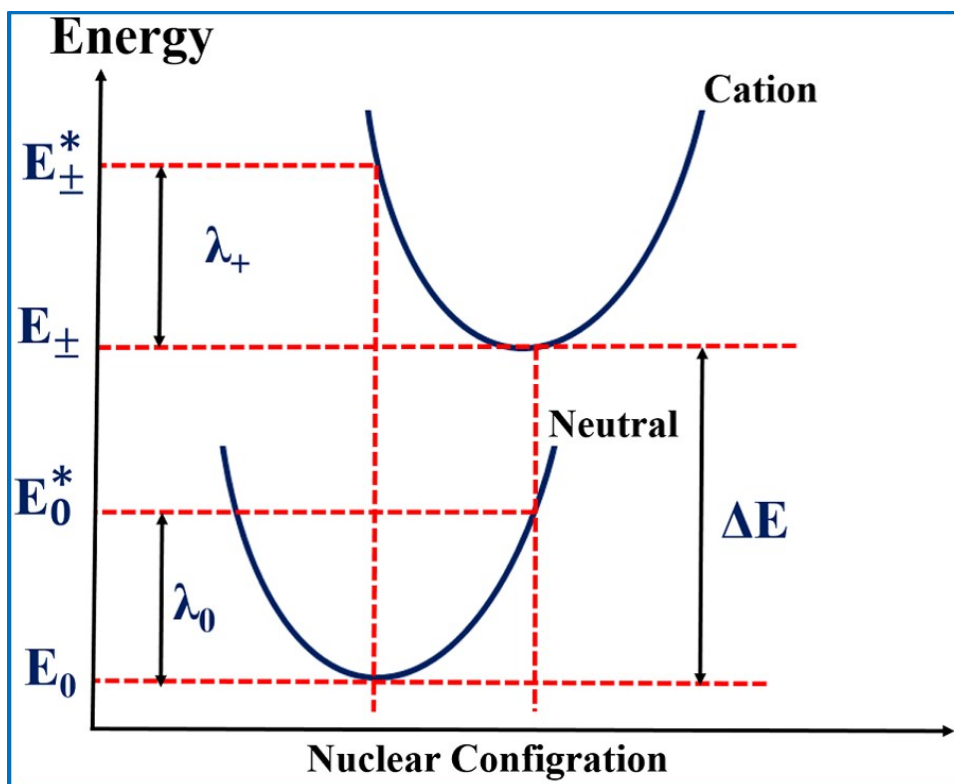

**Figure S 3.** Schematic of internal reorganization energy for hole/electron transfer.<sup>2,3</sup>

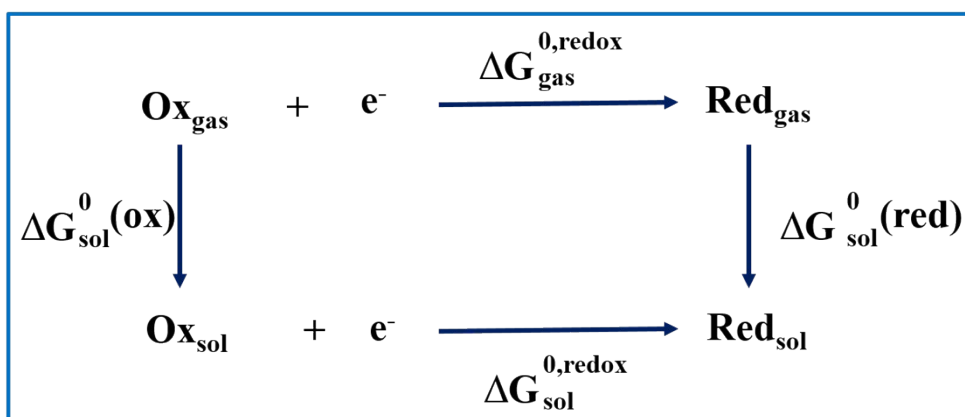

**Figure S 4.** Schematic representation of thermodynamic cycle used to calculate the reduction potentials of the designed dyes and iodide ion.<sup>4</sup>

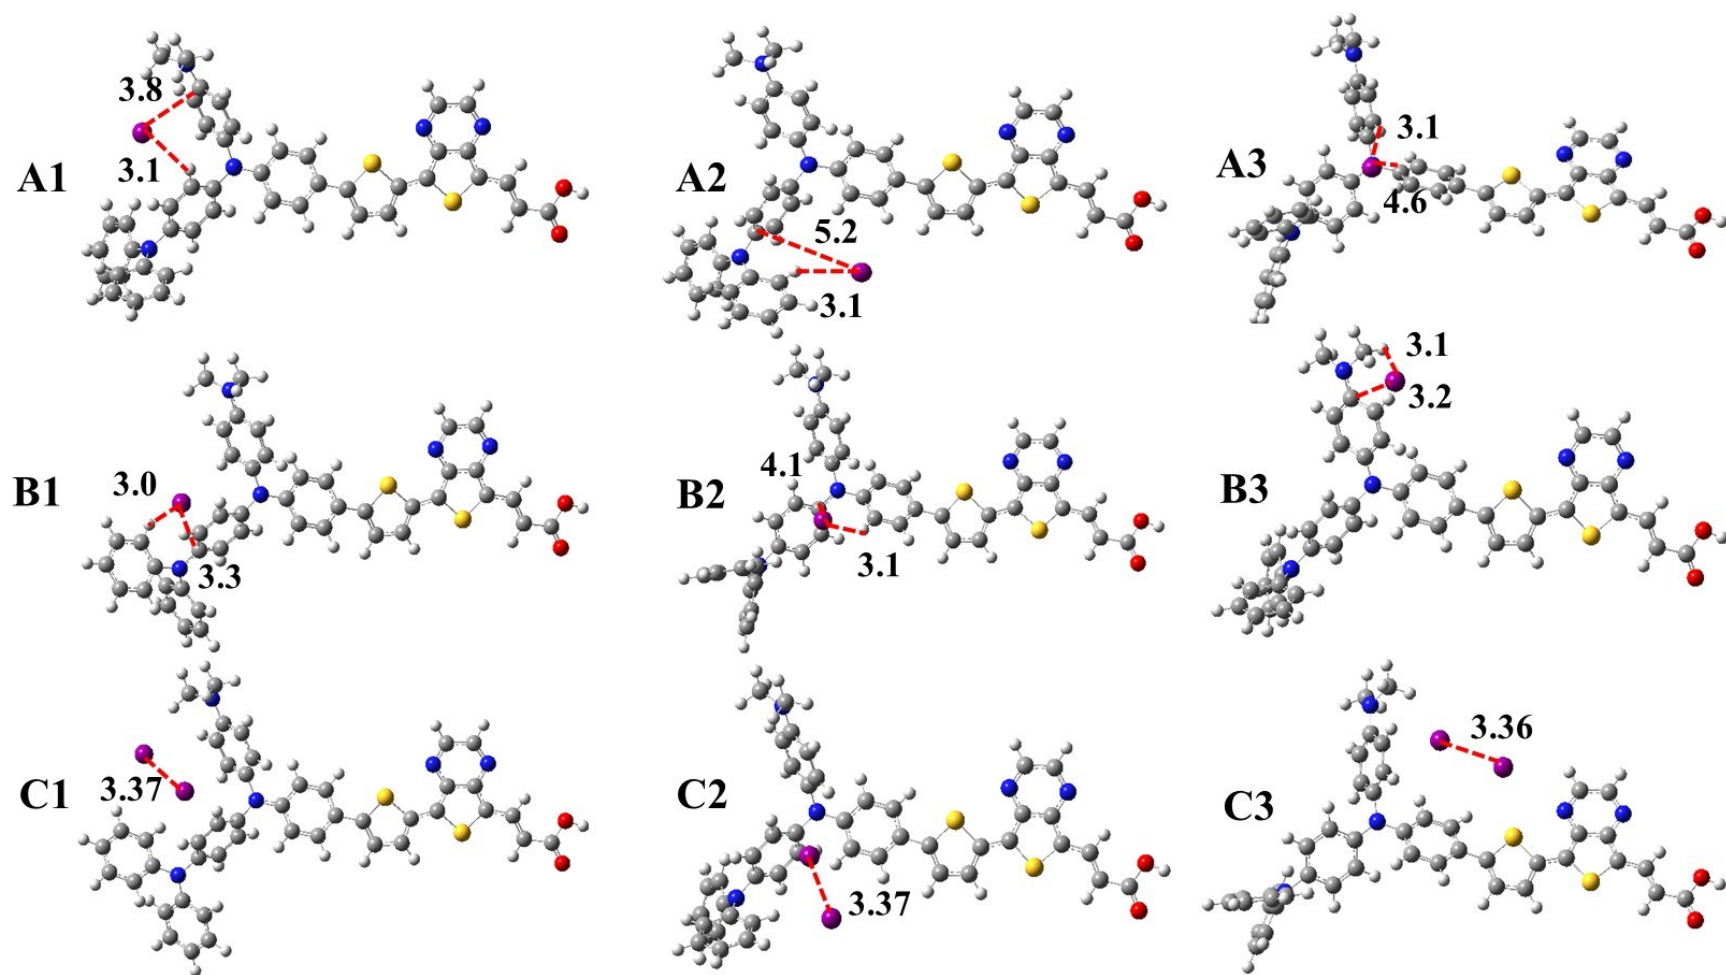

**Figure S 5.** The optimized geometries of A) [dyeI]<sup>-</sup> B) [dyeI]<sup>•</sup>, and C) [dyeI<sub>2</sub>]<sup>-</sup> dye-iodide complexes of the **dye2** sensitizer. The color scheme adopted is gray, white, blue, red, yellow and purple for C, H, N, O, S, and I atoms, respectively.

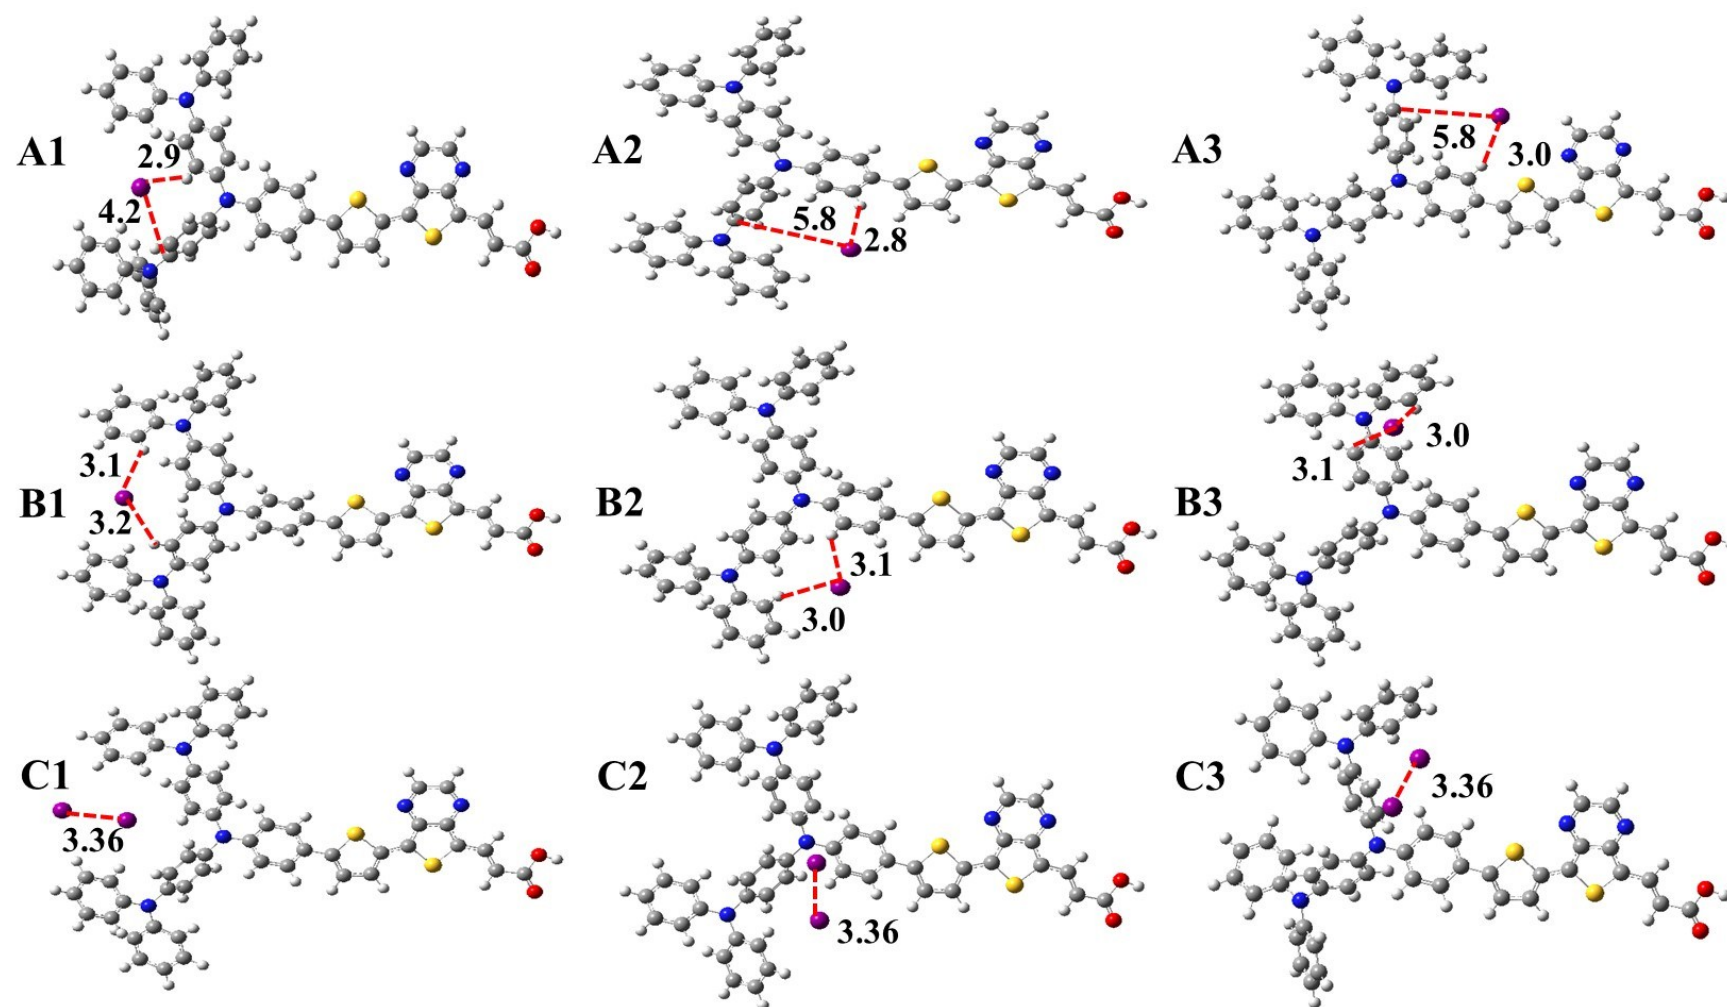

**Figure S 6.** The optimized geometries of A)  $[\text{dyeI}]^-$  B)  $[\text{dyeI}]^\bullet$ , and C)  $[\text{dyeI}_2]^-$  dye-iodide complexes of the designed **dye3** sensitizer. The color scheme is gray, white, blue, red, yellow and purple for C, H, N, O, S, and I atoms, respectively.



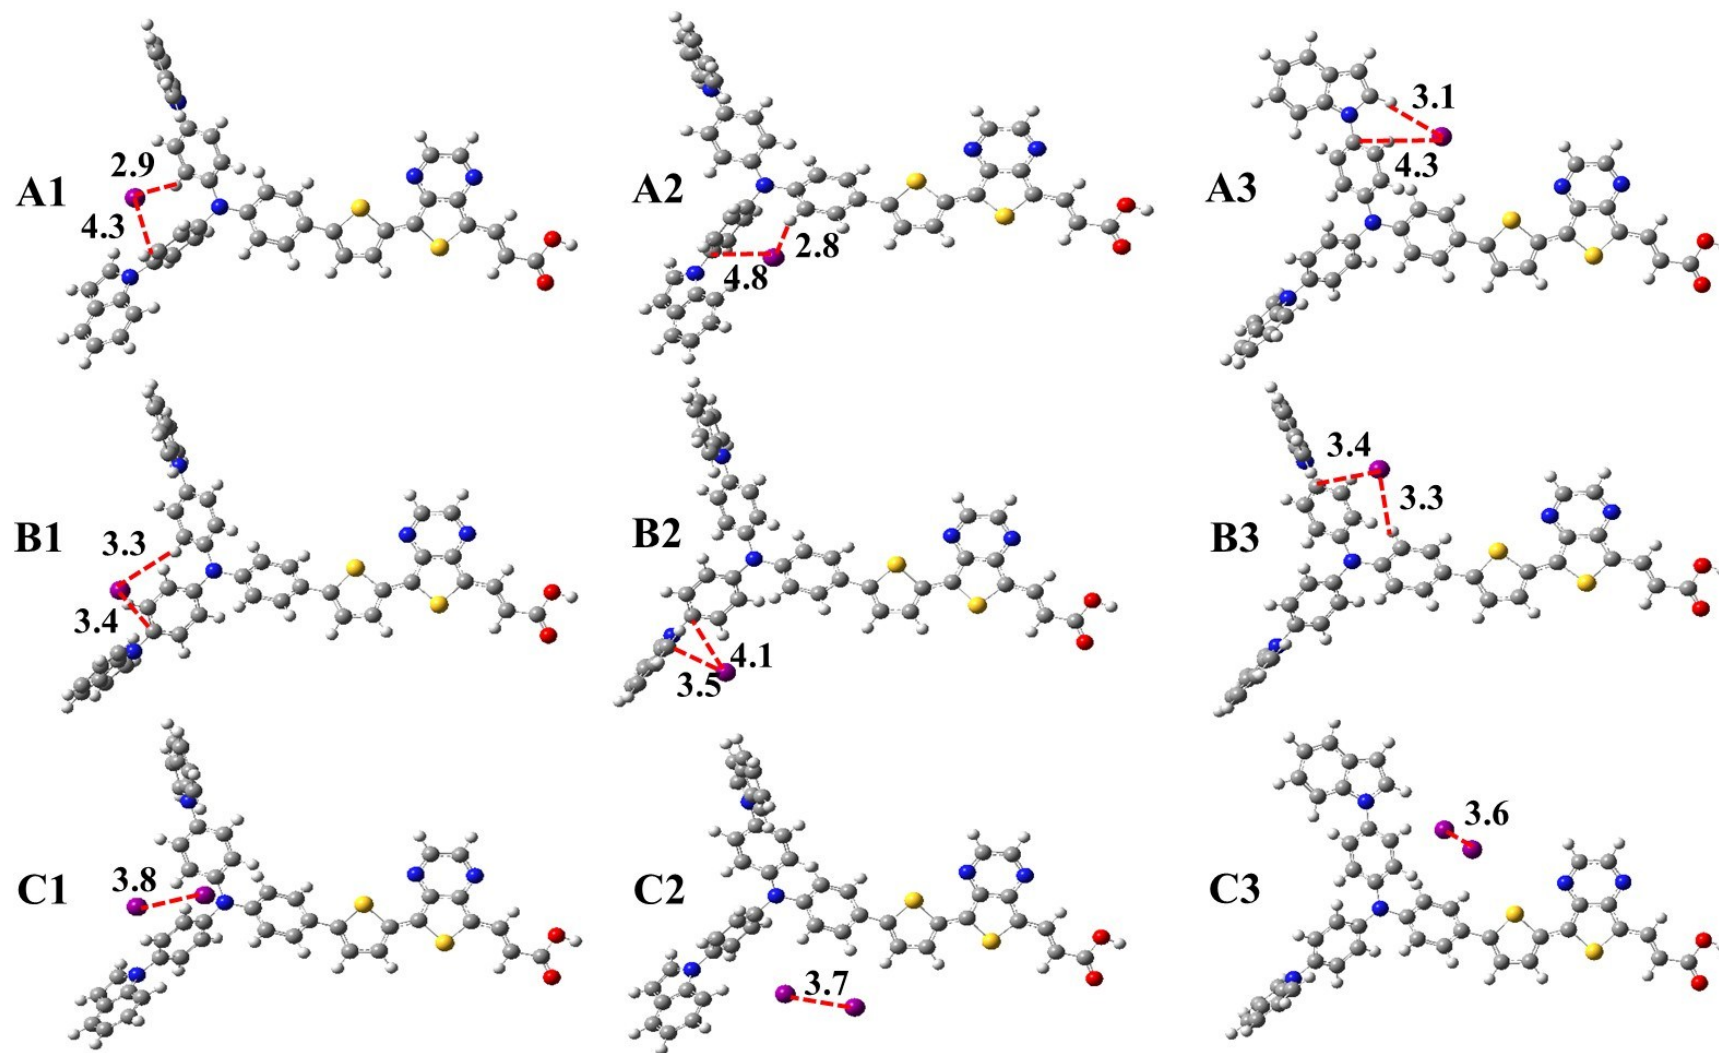

**Figure S 7.** The optimized geometries of A)  $[\text{dyeI}]^-$  B)  $[\text{dyeI}]^+$ , and C)  $[\text{dyeI}_2]^-$  dye-Iodide complexes of the designed **dye4** sensitizer. The color scheme is gray, white, blue, red, yellow and purple for C, H, N, O, S, and I atoms, respectively.

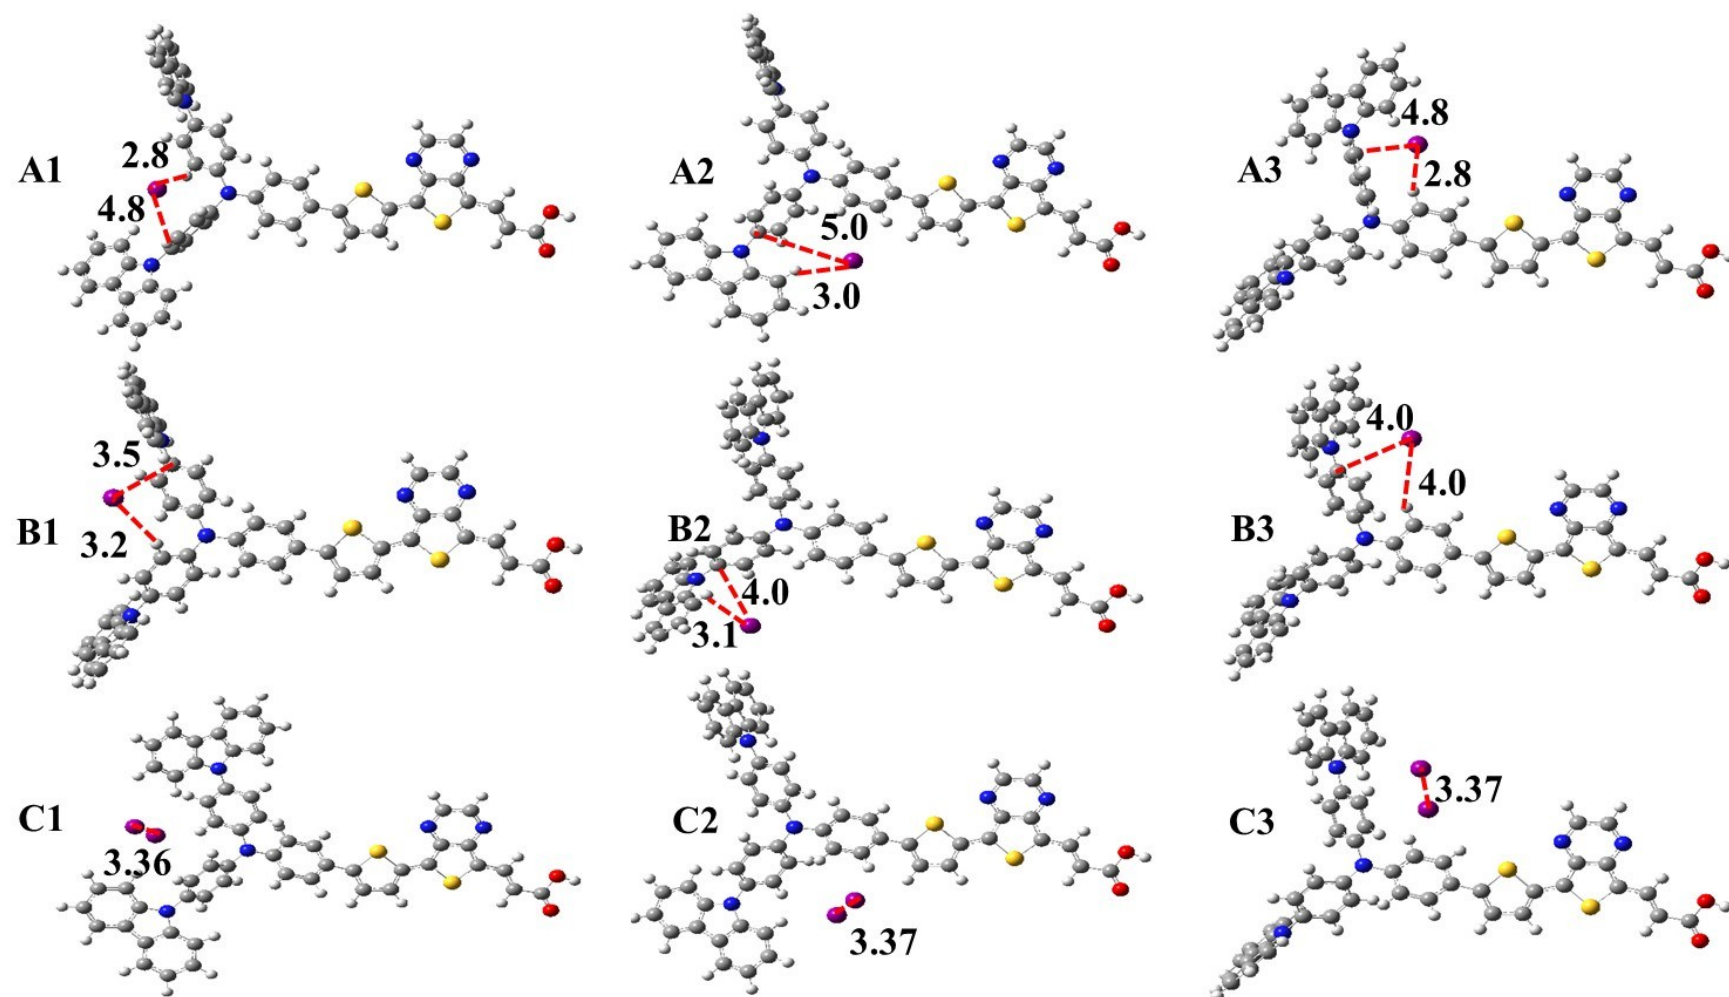

**Figure S 8.** The optimized geometries of A)  $[\text{dyeI}]^-$  B)  $[\text{dyeI}]^+$ , and C)  $[\text{dyeI}_2]^-$  dye-iodide complexes of the designed **dye5** sensitizer. The color scheme is gray, white, blue, red, yellow and purple for C, H, N, O, S, and I atoms, respectively.

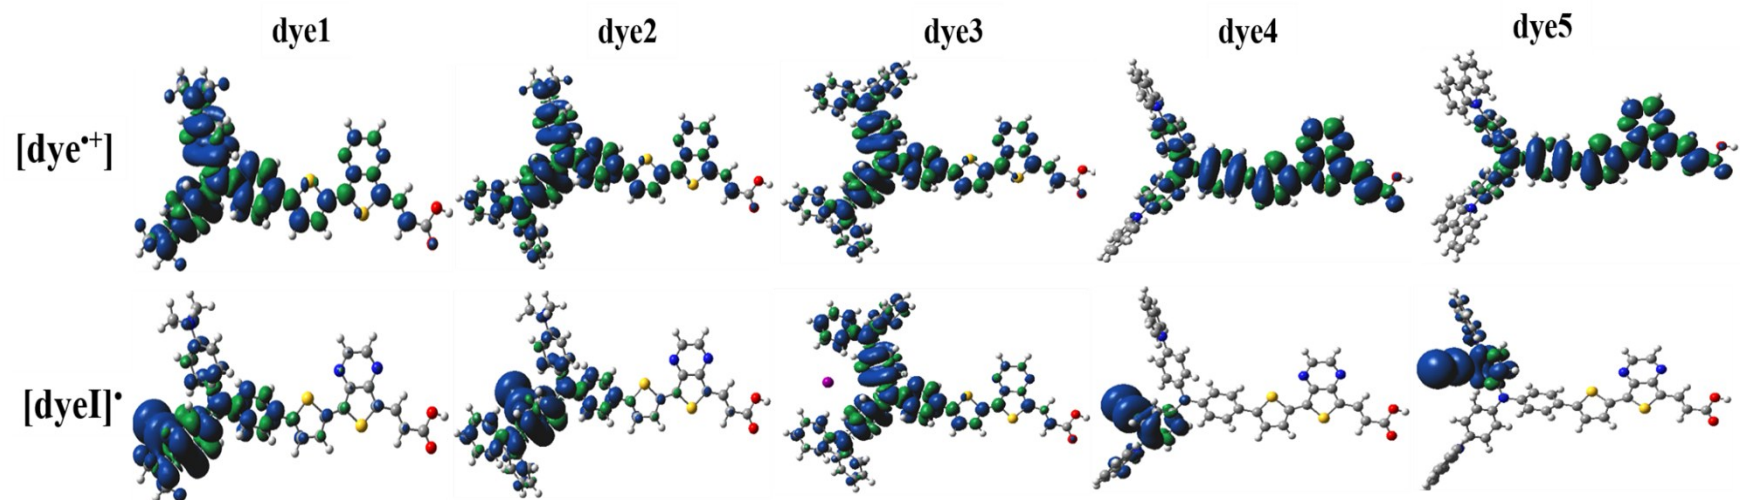

**Figure S 9.** Calculated isosurface plots of the spin density distribution of the radicaloid intermediate [dye\*+] and [dyeI]\* for the investigated sensitizers.

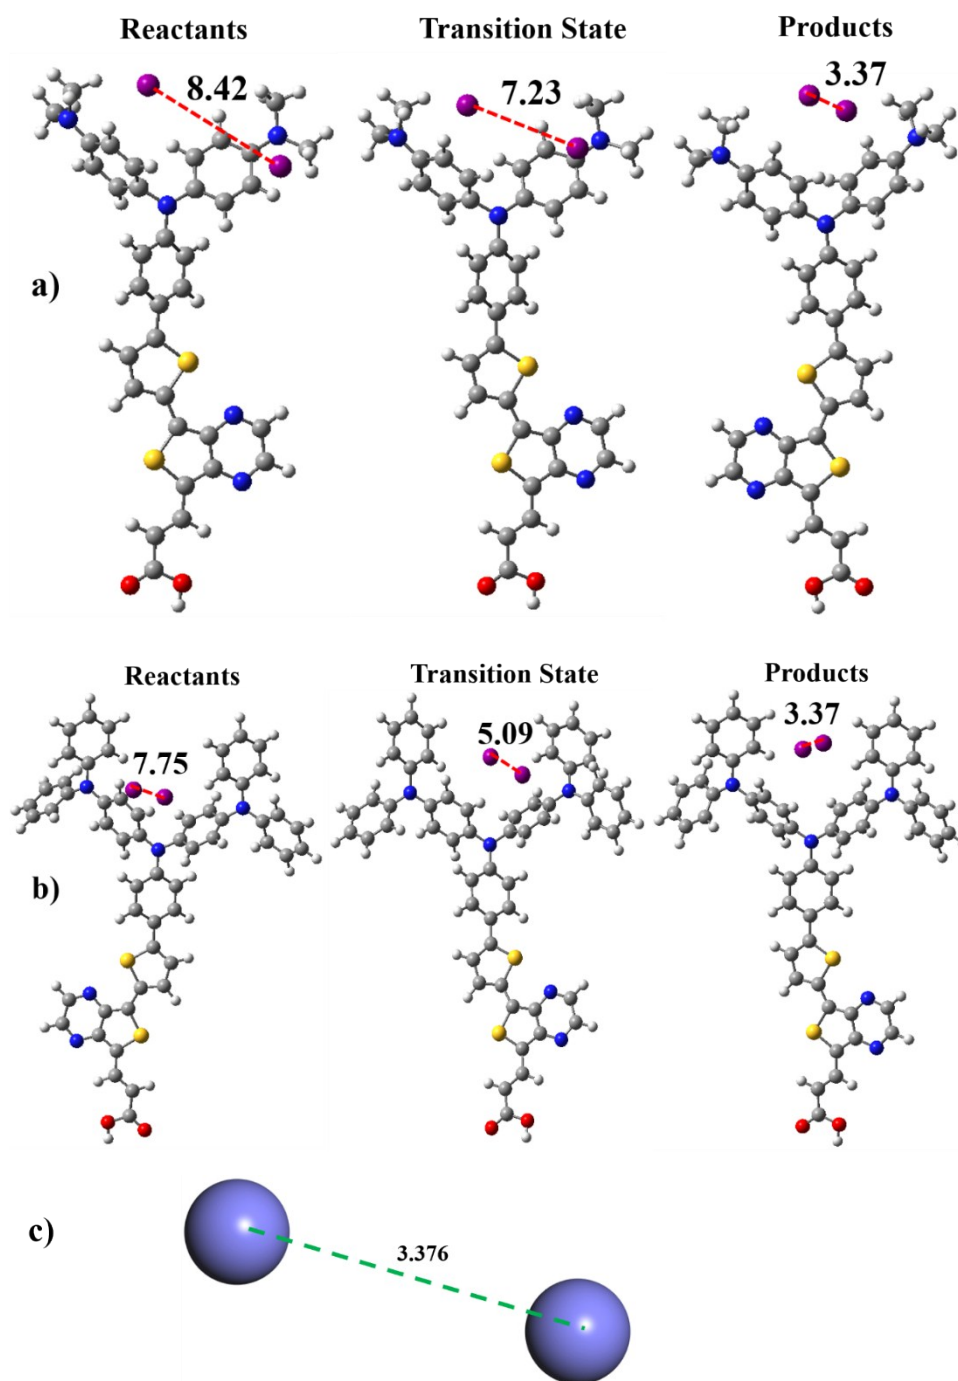

**Figure S 10.** The Schematic representaion of the geometries for the recombination reactions  $[\text{dye}^{*+} \dots \text{I}^- \dots \text{I}^-]$  of the most stable intermediate of  $[\text{dyeI}_2]^-$  complexes of a) dye1, b) dye3, and c) the diiodide radicaloid anion ( $\text{I}_2^{*-}$ ).

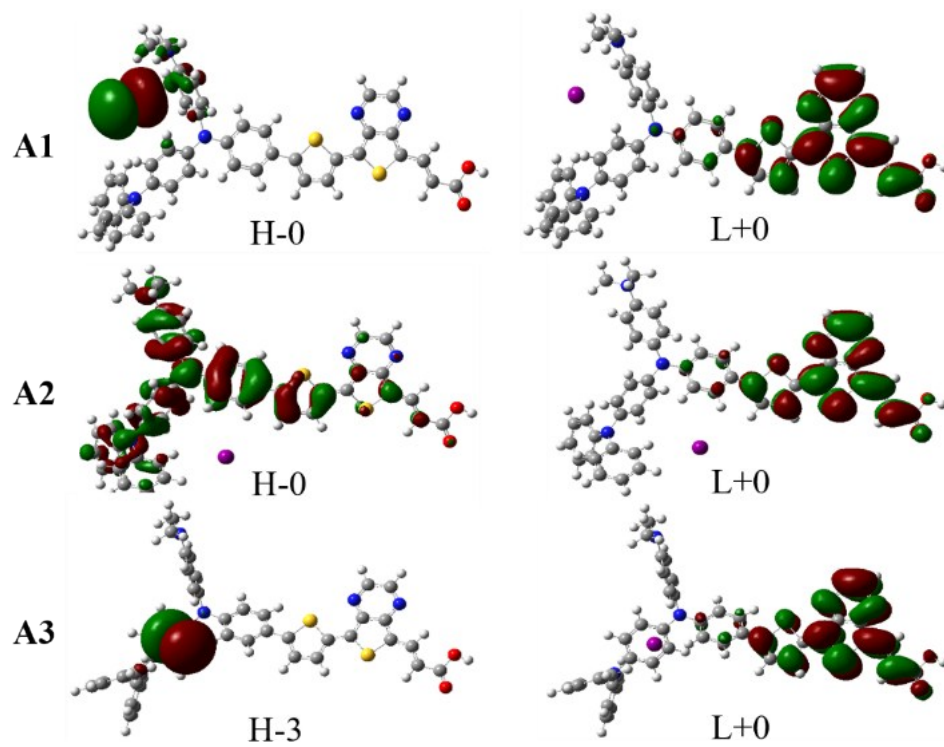

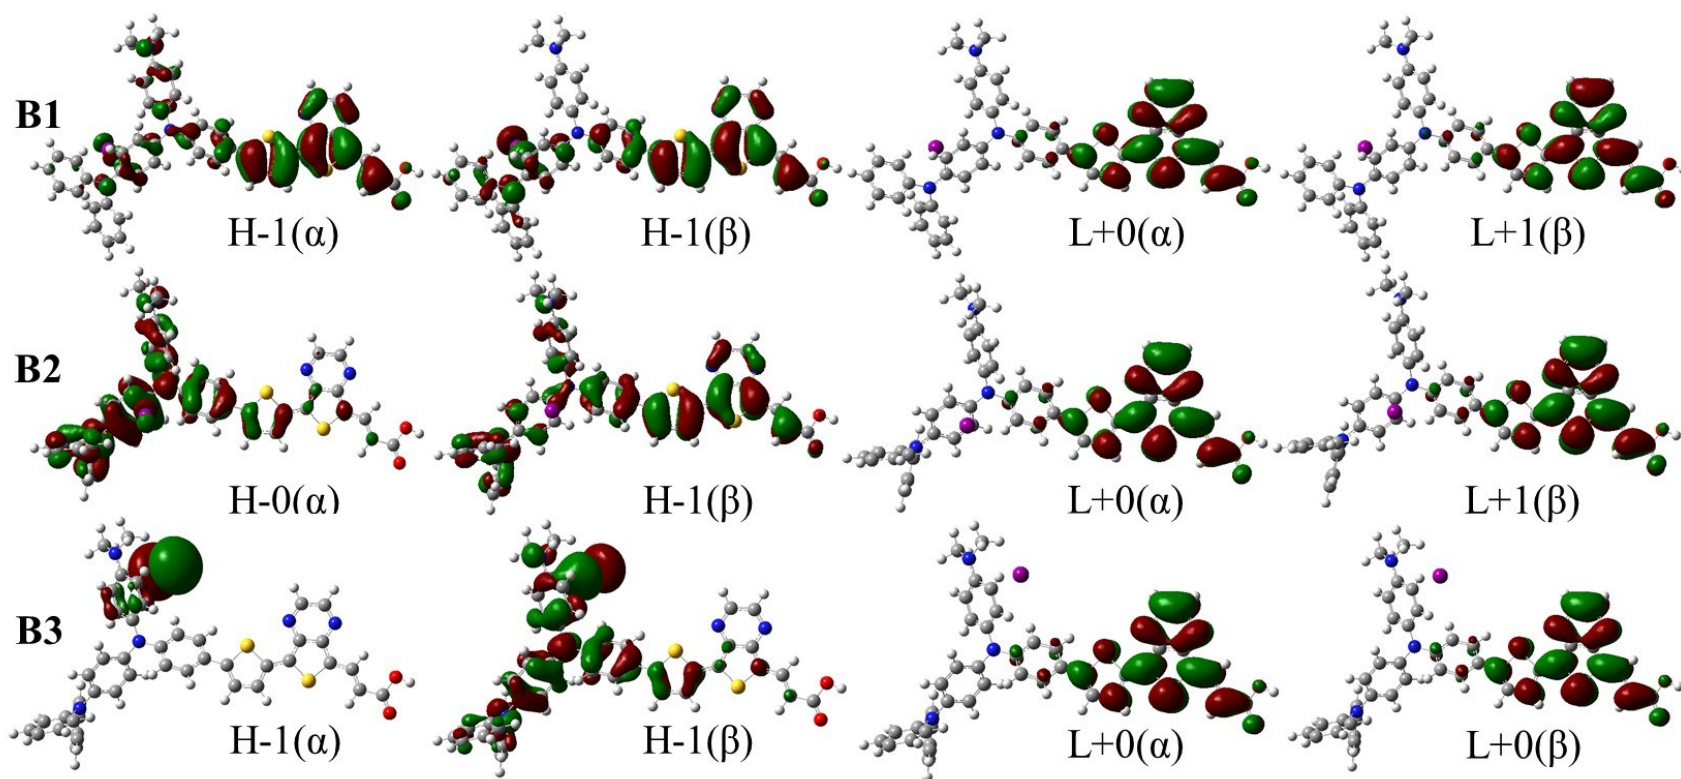

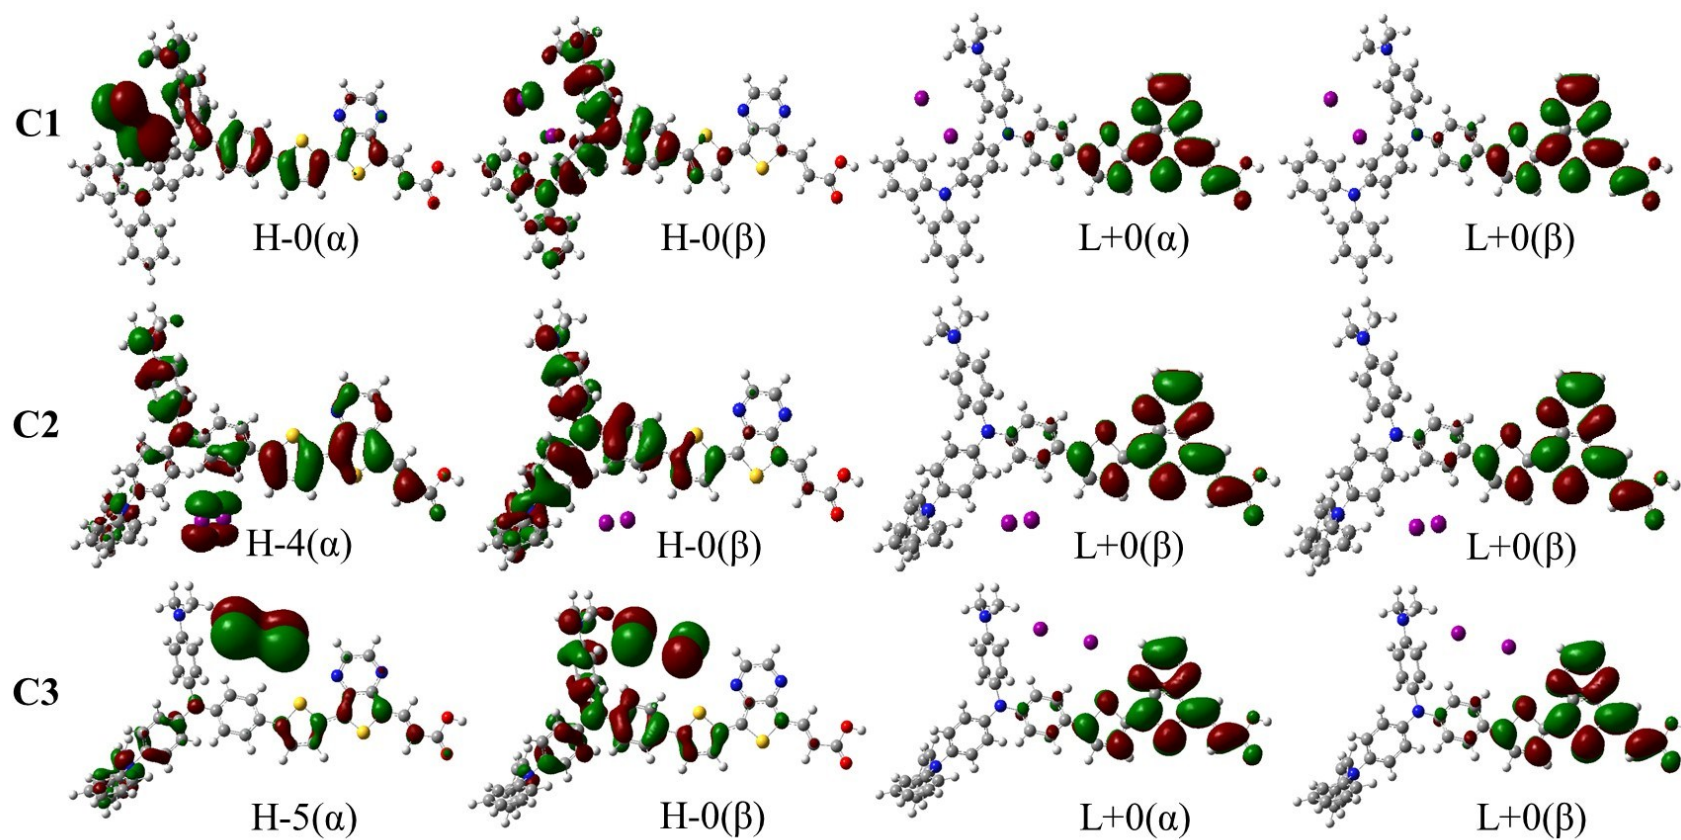

**Figure S 11.** Calculated isodensity plots of the selected frontier molecular orbitals of A)  $[\text{dyeI}]^-$  B)  $[\text{dyeI}]^+$ , and C)  $[\text{dyeI}_2]^-$  complexes of the designed **dye2** sensitizer at different iodide interaction sites (Isovalue is 0.02 a.u.).

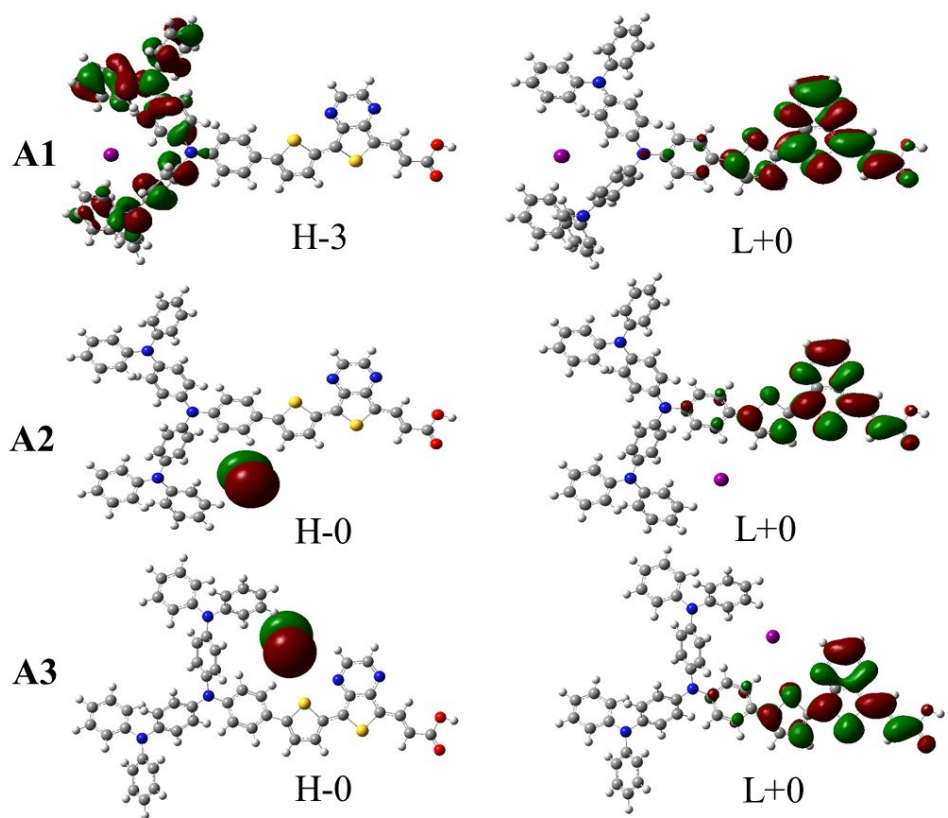



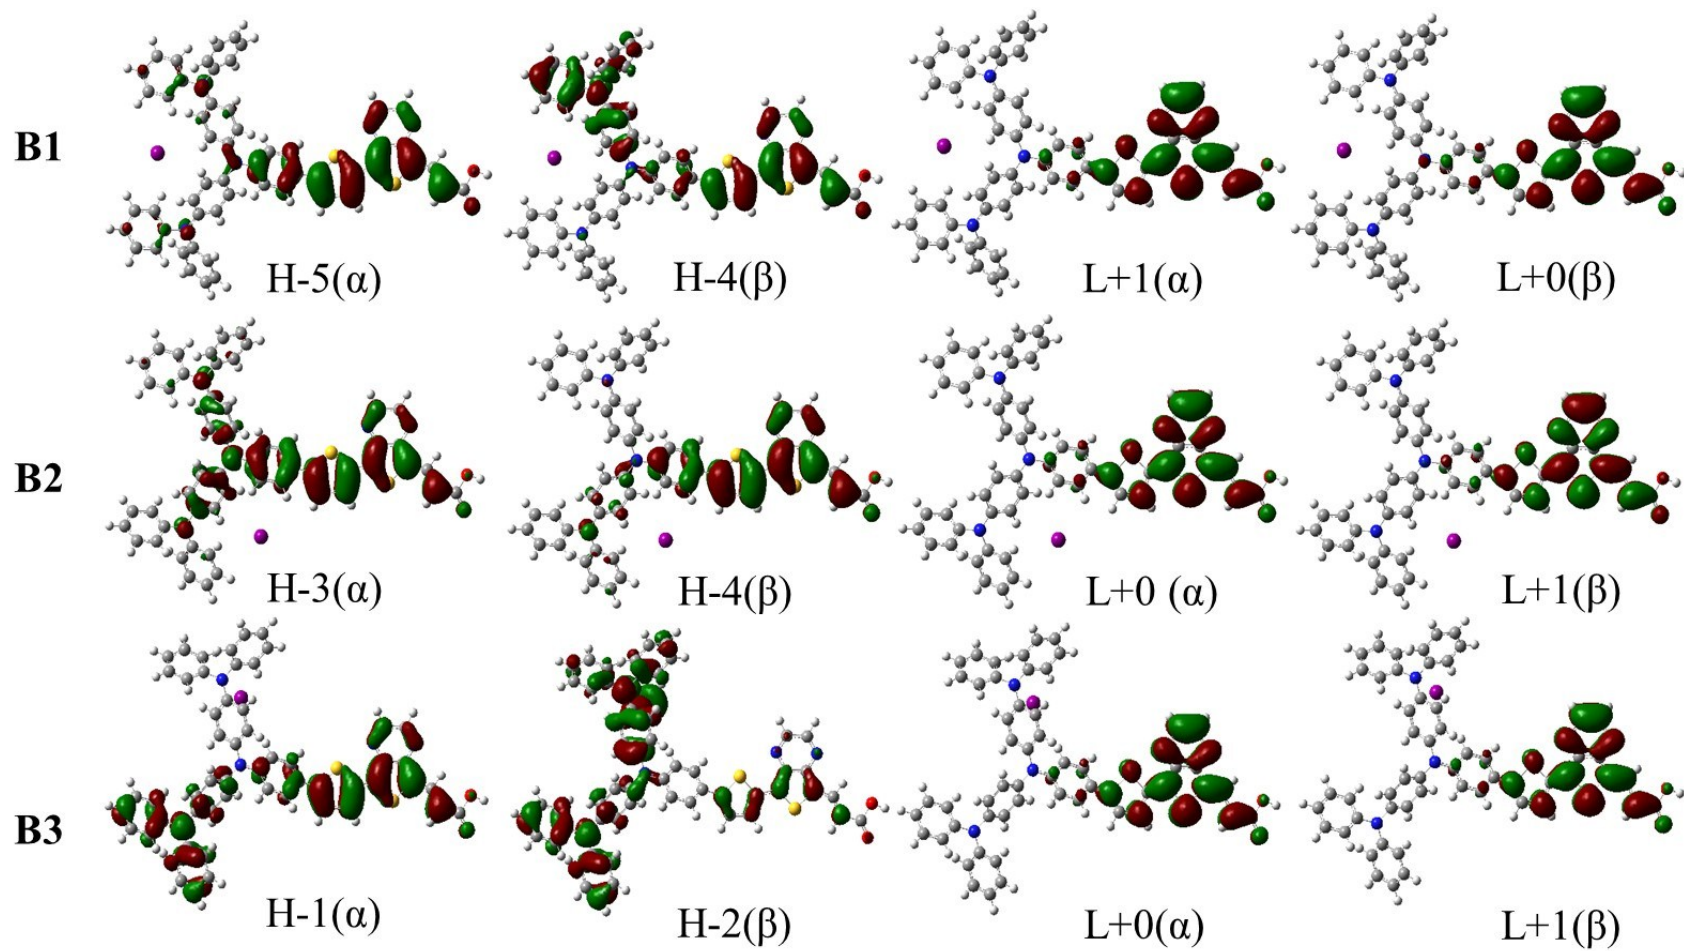

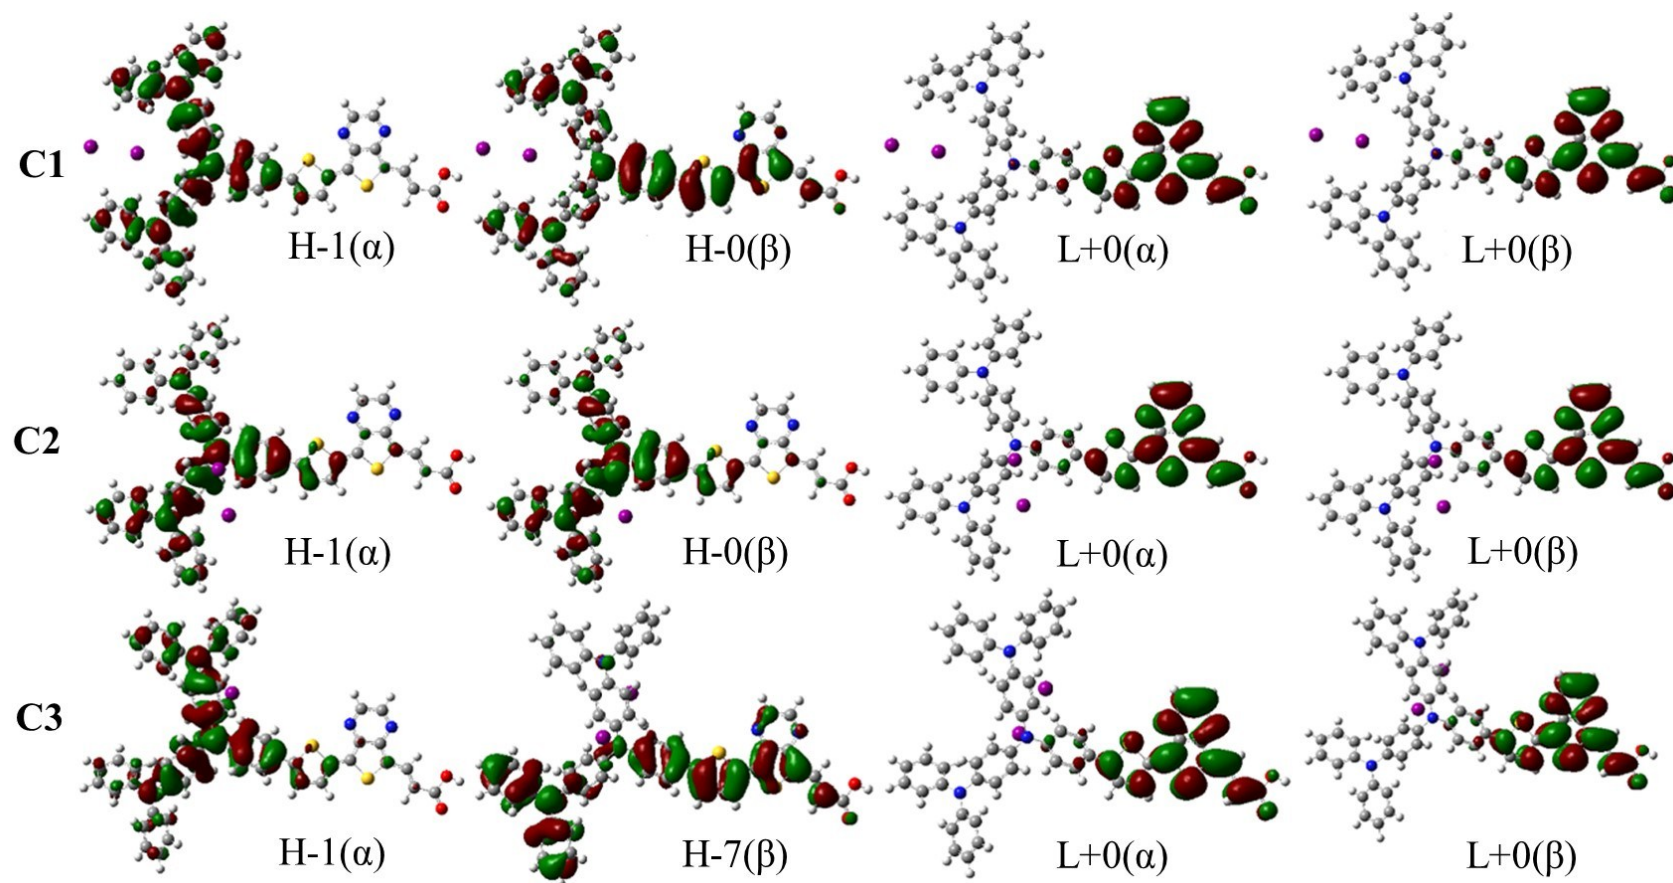

**Figure S 12.** Calculated isodensity plots of the selected frontier molecular orbitals of A)  $[\text{dyeI}]^-$  B)  $[\text{dyeI}]^+$ , and C)  $[\text{dyeI}_2]^-$  complexes of the designed **dye3** sensitizer at different iodide interaction sites (Isovalue is 0.02 a.u.).

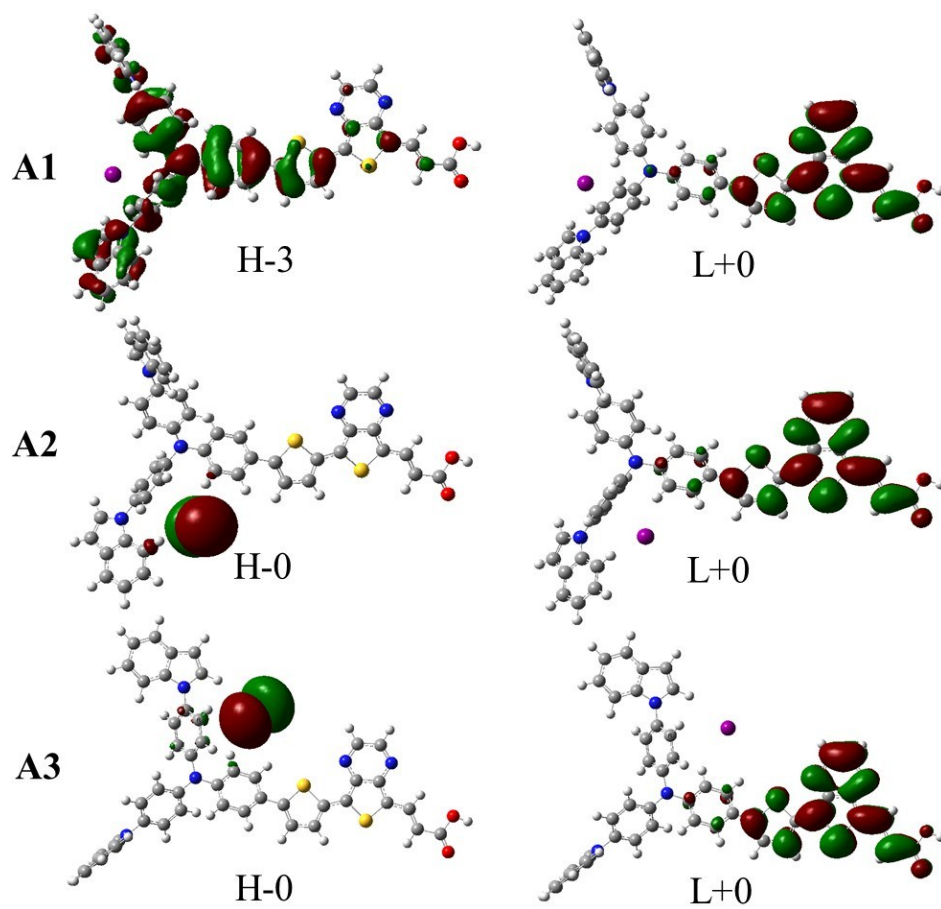

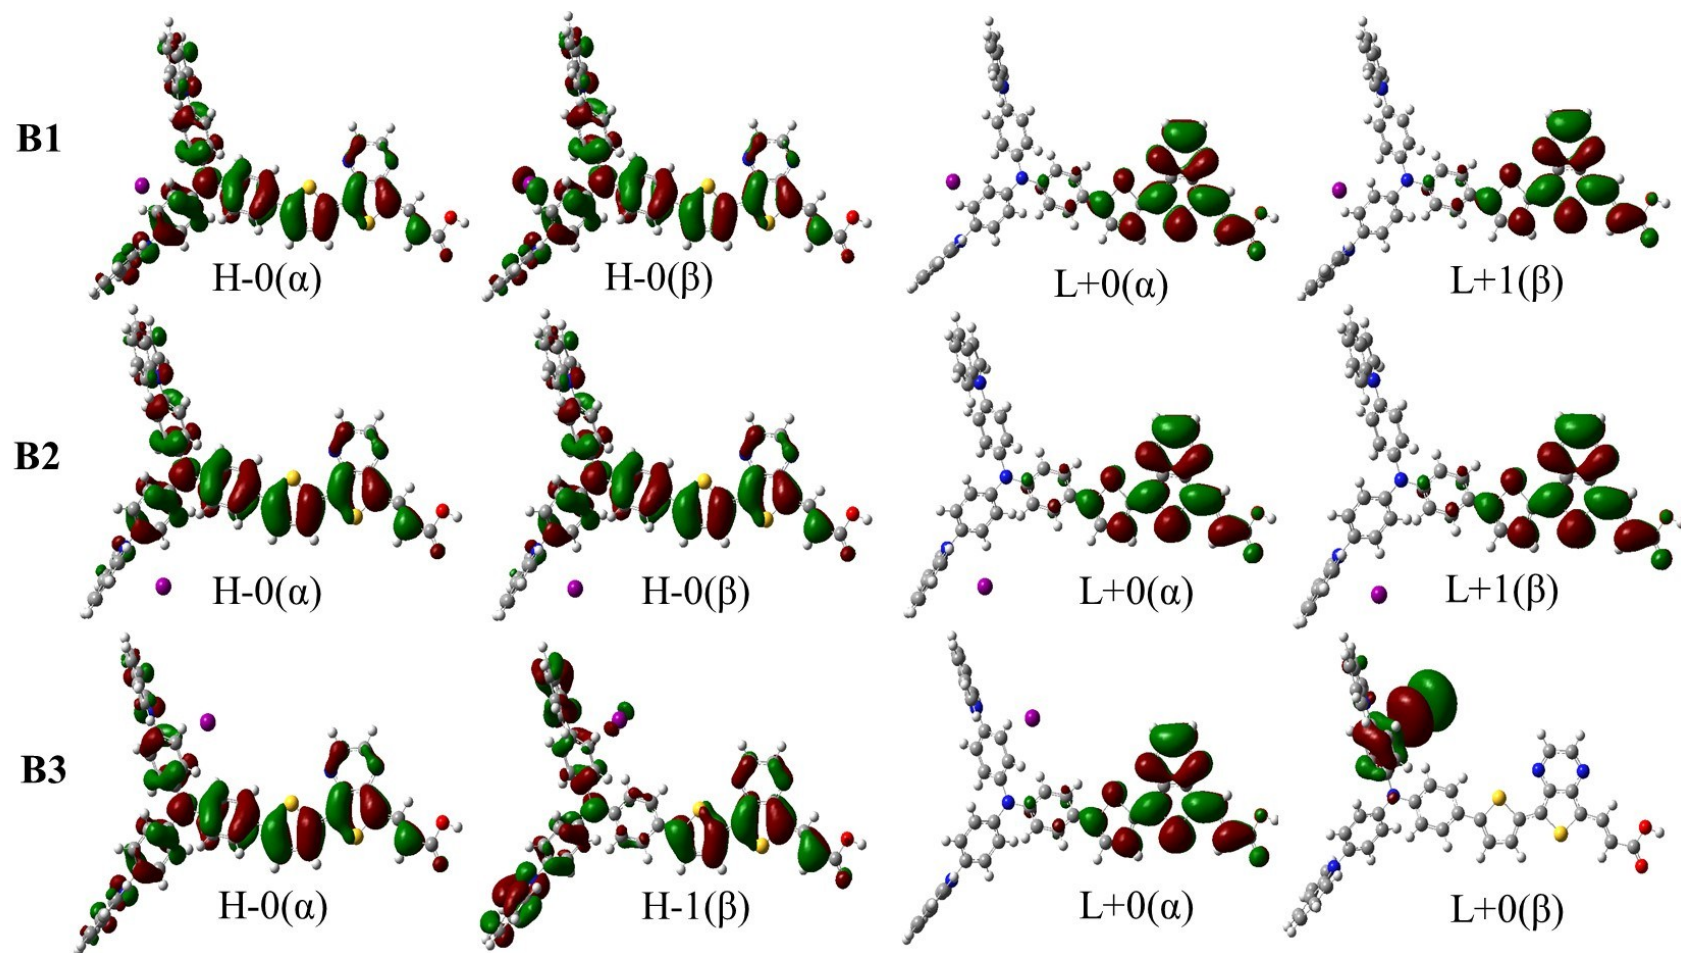

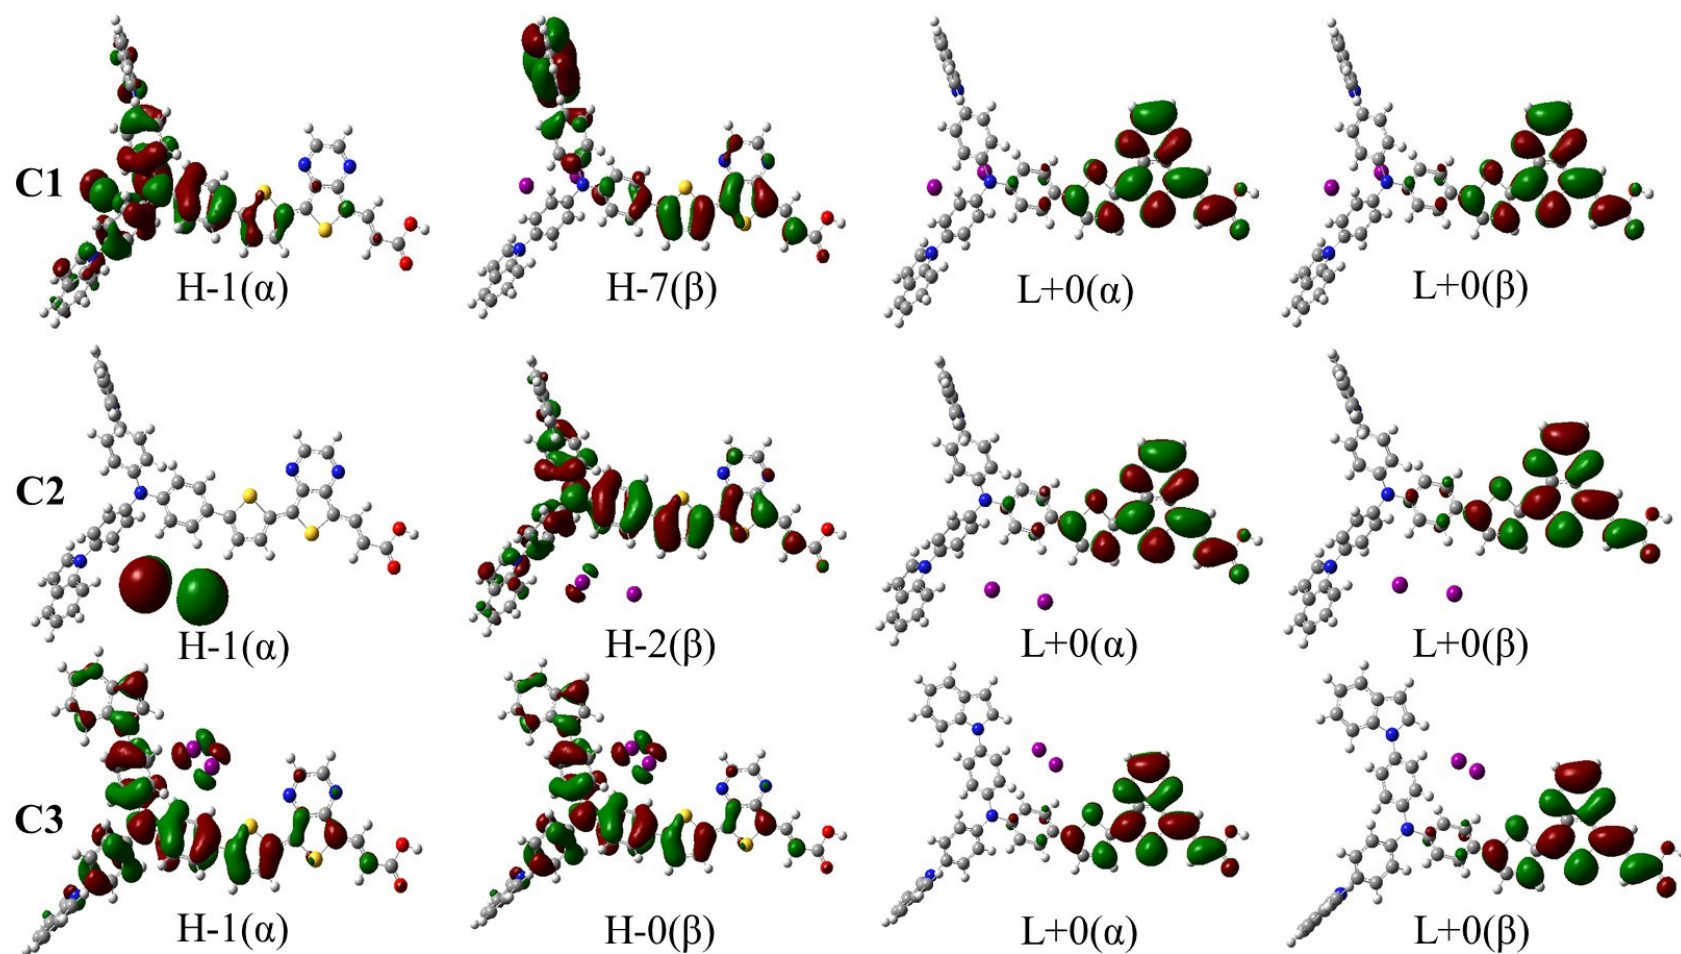

**Figure S 13.** Calculated isodensity plots of the selected frontier molecular orbitals of A)  $[\text{dyeI}]^-$  B)  $[\text{dyeI}]^+$ , and C)  $[\text{dyeI}_2]^+$  complexes of the designed **dye4** sensitizer at different iodide interaction sites (Isovalue is 0.02 a.u.).

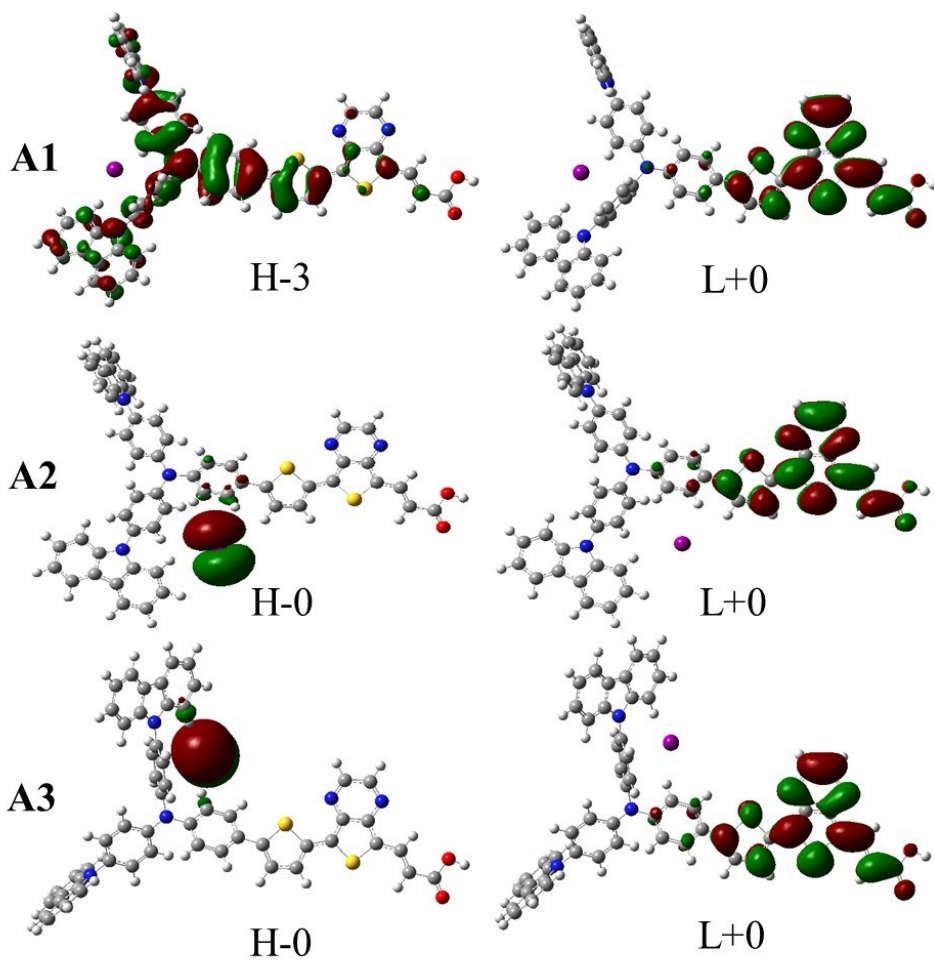

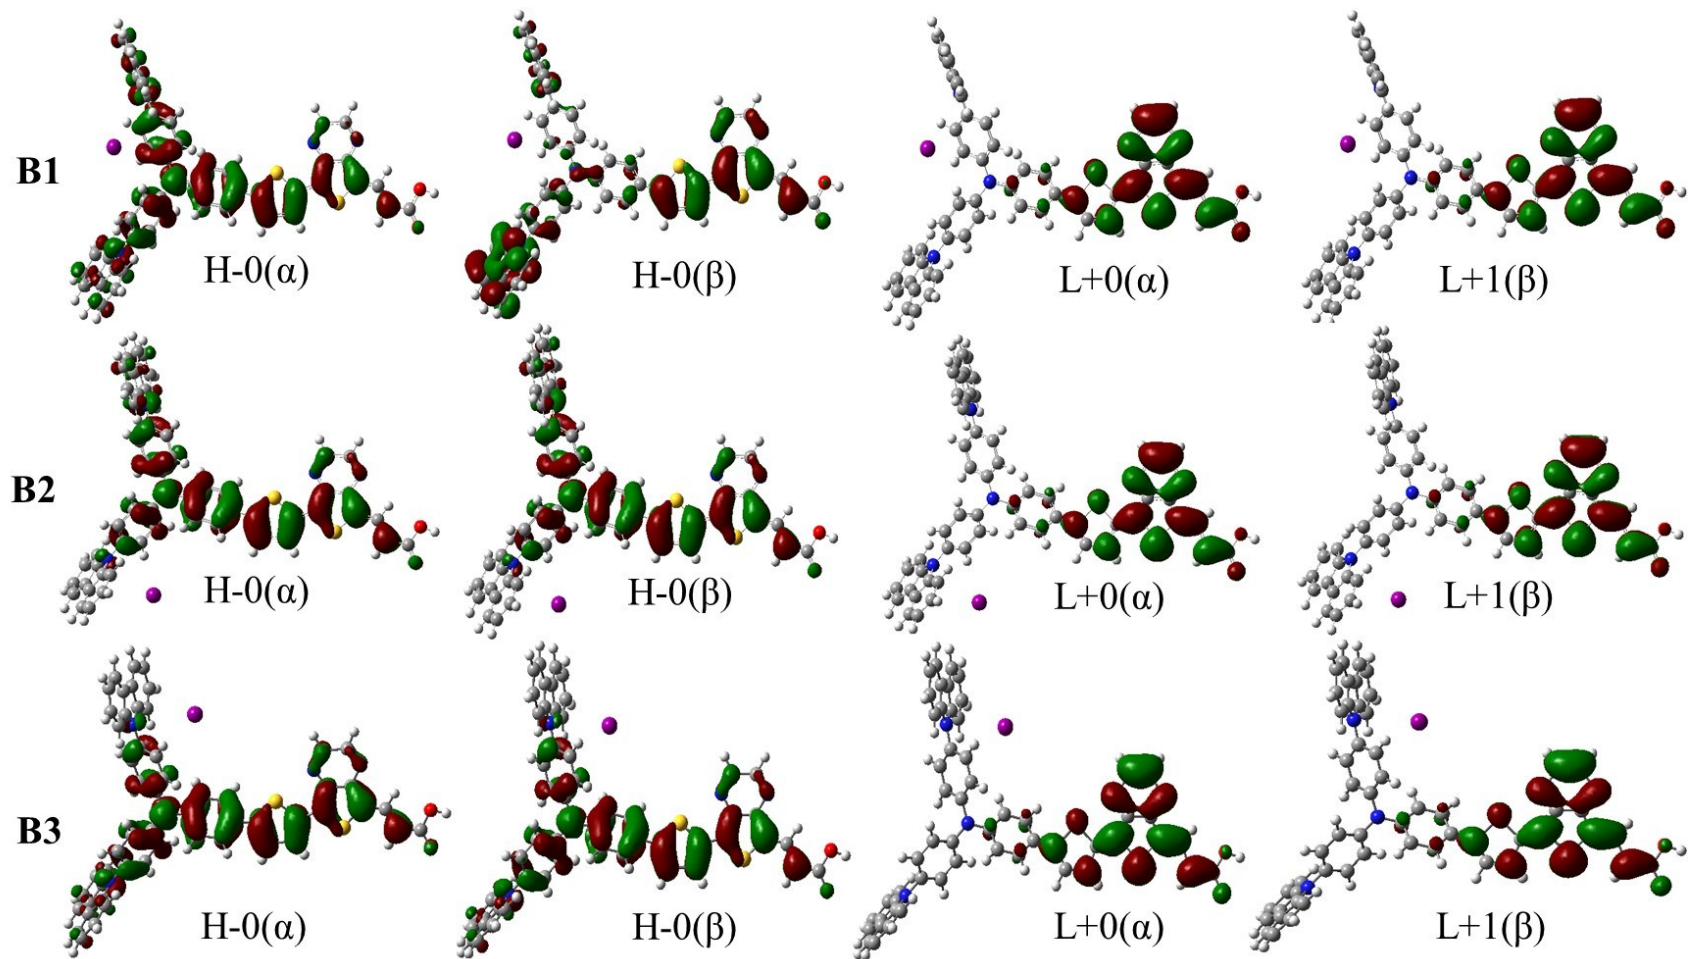

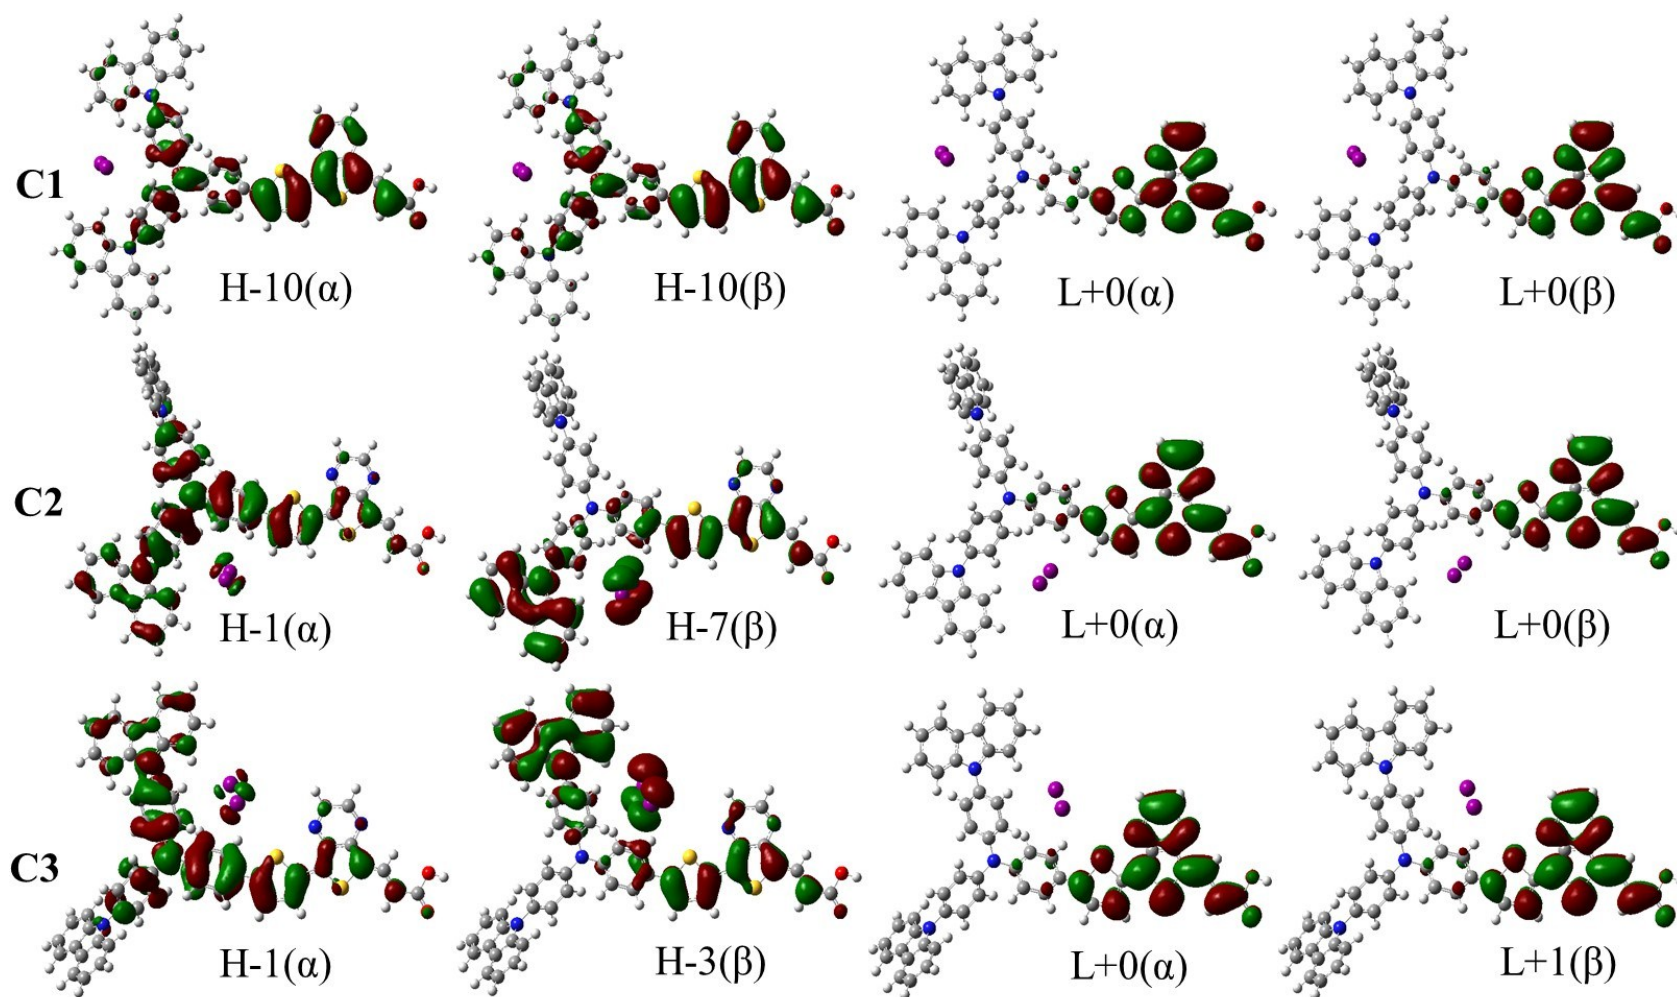

**Figure S 14.** Calculated isodensity plots of the selected frontier molecular orbitals of A)  $[\text{dyeI}]^-$  B)  $[\text{dyeI}]^+$ , and C)  $[\text{dyeI}_2]^-$  complexes of the designed **dye5** sensitizer at different iodide interaction sites (Isovalue is 0.02 a.u.).



**Table S 1.** Simulated UV-Vis absorption wavelength ( $\lambda$  in nm) for L1, L2<sup>5</sup> and TT2A<sup>6</sup> organic dyes with different DFT functional.

| <b>DFT Methods</b>      | <b>L1</b><br>$\lambda$ (nm) in CH <sub>3</sub> CN | <b><sup>a</sup>Exp.</b>                    |
|-------------------------|---------------------------------------------------|--------------------------------------------|
| TDB3LYP//B3LYP          | 555                                               | <b>404 nm</b><br><br>in CH <sub>3</sub> CN |
| TDCAM-B3LYP//B3LYP      | 449                                               |                                            |
| TDCAMB3LYP//CAMB3LYP    | 422                                               |                                            |
| TDM06-2X//M06-2X        | 429                                               |                                            |
| <b>TDWB97XD//WB97XD</b> | <b>403</b>                                        |                                            |
|                         | <b>L2</b><br>$\lambda$ (nm) in CH <sub>3</sub> CN | <b>427 nm</b>                              |
| TDB3LYP//B3LYP          | 597                                               | in CH <sub>3</sub> CN                      |
| TDCAM-B3LYP//B3LYP      | 458                                               |                                            |
| TDCAMB3LYP//CAMB3LYP    | 430                                               |                                            |
| TDM06-2X//M06-2X        | 435                                               |                                            |
| <b>TDWB97XD//WB97XD</b> | <b>413</b>                                        |                                            |
|                         | <b>TT2A</b><br>$\lambda$ (nm) in DCM              | <b>405 nm</b>                              |
| TDB3LYP//B3LYP          | 630                                               | (in DCM)                                   |
| TDCAM-B3LYP//B3LYP      | 481                                               |                                            |
| TDCAMB3LYP//CAMB3LYP    | 441                                               |                                            |
| TDM06-2X//M06-2X        | 445                                               |                                            |
| <b>TDWB97XD//WB97XD</b> | <b>416</b>                                        |                                            |

<sup>a</sup> taken from Ref<sup>1</sup>

**Table S 2.** The selected bond lengths (in Å) and dihedral angles (in °) for the D–D– $\pi$ –A organic dyes.

| Parameters                                                                     | dye1   | dye2      | dye3   | dye4   | dye5   | dyeH   |
|--------------------------------------------------------------------------------|--------|-----------|--------|--------|--------|--------|
| $r_1$ (N <sub>1</sub> -C <sub>2</sub> )                                        | 1.395  | 1.398     | 1.402  | 1.411  | 1.411  | 1.408  |
| $r_2$ (C <sub>9</sub> -C <sub>32</sub> )                                       | 1.465  | 1.465     | 1.466  | 1.467  | 1.467  | 1.467  |
| $r_3$ (C <sub>37</sub> -C <sub>39</sub> )                                      | 1.442  | 1.442     | 1.443  | 1.443  | 1.443  | 1.443  |
| $r_4$ (C <sub>40</sub> -C <sub>50</sub> )                                      | 1.436  | 1.437     | 1.437  | 1.438  | 1.437  | 1.437  |
| $\phi_1$ (C <sub>22</sub> -N <sub>1</sub> -C <sub>2</sub> -C <sub>4</sub> )    | -28.03 | -26.82    | -32.61 | -38.97 | -39.41 | -36.49 |
| $\phi_2$ (C <sub>7</sub> -C <sub>9</sub> -C <sub>32</sub> -S <sub>33</sub> )   | 31.31  | 33.54     | 32.11  | 32.69  | 33.12  | 32.82  |
| $\phi_3$ (C <sub>35</sub> -C <sub>37</sub> -C <sub>39</sub> -C <sub>41</sub> ) | -0.91  | 0.67      | -2.67  | -1.78  | -2.06  | -0.47  |
| $\phi_4$ (S <sub>41</sub> -C <sub>40</sub> -C <sub>50</sub> -C <sub>52</sub> ) | 0.19   | -0.29     | 0.26   | 0.29   | 0.33   | 0.04   |
| $\phi_5$ (S <sub>25</sub> -C <sub>29</sub> -R)                                 | 11.0   | -46 (-10) | -40.0  | -50.0  | -61.0  | -      |

| dye1  |            |       | dye3  |            |       | dye3  |            |       | dye4  |            |       | dye5  |            |       |
|-------|------------|-------|-------|------------|-------|-------|------------|-------|-------|------------|-------|-------|------------|-------|
| Atoms | NBO Charge | $f^+$ |
| 1N    | -0.49      | -0.49 | 1N    | -0.49      | -0.48 | 1N    | -0.49      | -0.48 | 1N    | -0.49      | -0.36 | 1N    | -0.49      | -0.36 |
| 2C    | 0.20       | 0.17  | 2C    | 0.19       | 0.16  | 2C    | 0.19       | 0.15  | 2C    | 0.17       | 0.01  | 2C    | 0.18       | 0.01  |
| 3C    | -0.25      | -0.18 | 3C    | -0.24      | -0.17 | 3C    | -0.24      | -0.17 | 3C    | -0.22      | -0.12 | 3C    | -0.23      | -0.12 |
| 4C    | -0.24      | -0.18 | 4C    | -0.24      | -0.17 | 4C    | -0.24      | -0.17 | 4C    | -0.22      | -0.12 | 4C    | -0.22      | -0.11 |
| 5C    | -0.17      | -0.05 | 5C    | -0.17      | -0.06 | 5C    | -0.17      | -0.06 | 5C    | -0.17      | -0.11 | 5C    | -0.17      | -0.11 |
| 6H    | 0.22       | 0.10  | 6H    | 0.22       | 0.11  | 6H    | 0.22       | 0.11  | 6H    | 0.22       | 0.11  | 6H    | 0.22       | 0.10  |
| 7C    | -0.16      | -0.05 | 7C    | -0.16      | -0.06 | 7C    | -0.16      | -0.06 | 7C    | -0.17      | -0.12 | 7C    | -0.16      | -0.12 |
| 8H    | 0.22       | 0.11  | 8H    | 0.22       | 0.10  |
| 9C    | -0.13      | -0.15 | 9C    | -0.12      | -0.13 | 9C    | -0.12      | -0.13 | 9C    | -0.10      | -0.09 | 9C    | -0.09      | -0.08 |
| 10H   | 0.21       | 0.09  | 10H   | 0.21       | 0.09  | 10H   | 0.21       | 0.10  | 10H   | 0.23       | 0.12  | 10H   | 0.22       | 0.10  |
| 11H   | 0.21       | 0.09  | 11H   | 0.22       | 0.09  | 11H   | 0.21       | 0.10  | 11H   | 0.22       | 0.11  | 11H   | 0.21       | 0.10  |
| 12C   | 0.12       | 0.07  | 12C   | 0.11       | 0.06  | 12C   | 0.15       | 0.10  | 12C   | 0.16       | 0.11  | 12C   | 0.17       | 0.12  |
| 13C   | -0.19      | -0.14 | 13C   | -0.19      | -0.13 | 13C   | -0.21      | -0.15 | 13C   | -0.21      | -0.13 | 13C   | -0.22      | -0.13 |
| 14C   | -0.19      | -0.14 | 14C   | -0.19      | -0.13 | 14C   | -0.21      | -0.15 | 14C   | -0.22      | -0.12 | 14C   | -0.22      | -0.13 |
| 15C   | -0.26      | -0.13 | 15C   | -0.26      | -0.13 | 15C   | -0.22      | -0.09 | 15C   | -0.19      | -0.09 | 15C   | -0.19      | -0.09 |
| 16H   | 0.22       | 0.11  | 16H   | 0.22       | 0.10  | 16H   | 0.22       | 0.11  | 16H   | 0.22       | 0.11  | 16H   | 0.22       | 0.11  |
| 17C   | -0.26      | -0.13 | 17C   | -0.26      | -0.13 | 17C   | -0.22      | -0.09 | 17C   | -0.19      | -0.09 | 17C   | -0.19      | -0.09 |
| 18H   | 0.22       | 0.10  | 18H   | 0.22       | 0.10  | 18H   | 0.22       | 0.11  | 18H   | 0.22       | 0.11  | 18H   | 0.23       | 0.11  |
| 19C   | 0.19       | 0.04  | 19C   | 0.19       | 0.05  | 19C   | 0.16       | 0.01  | 19C   | 0.14       | 0.04  | 19C   | 0.14       | 0.04  |
| 20H   | 0.21       | 0.09  | 20H   | 0.21       | 0.09  | 20H   | 0.22       | 0.10  | 20H   | 0.22       | 0.11  | 20H   | 0.22       | 0.11  |
| 21H   | 0.21       | 0.09  | 21H   | 0.21       | 0.09  | 21H   | 0.22       | 0.10  | 21H   | 0.23       | 0.11  | 21H   | 0.22       | 0.11  |
| 22C   | 0.12       | 0.06  | 22C   | 0.16       | 0.08  | 22C   | 0.15       | 0.08  | 22C   | 0.16       | 0.11  | 22C   | 0.17       | 0.11  |
| 23C   | -0.19      | -0.14 | 23C   | -0.22      | -0.16 | 23C   | -0.21      | -0.15 | 23C   | -0.23      | -0.12 | 23C   | -0.21      | -0.12 |
| 24C   | -0.19      | -0.13 | 24C   | -0.21      | -0.15 | 24C   | -0.20      | -0.15 | 24C   | -0.23      | -0.13 | 24C   | -0.21      | -0.13 |
| 25C   | -0.26      | -0.13 | 25C   | -0.21      | -0.09 | 25C   | -0.22      | -0.09 | 25C   | -0.19      | -0.09 | 25C   | -0.19      | -0.09 |
| 26H   | 0.22       | 0.10  | 26H   | 0.22       | 0.11  | 26H   | 0.22       | 0.11  | 26H   | 0.23       | 0.11  | 26H   | 0.22       | 0.11  |

**Table S 3.** Calculated atomic charges from NBO Method<sup>a</sup> and the condensed Fukui functions ( $f^+$ )<sup>b</sup> values (for nucleophilic attack).

|     |       |       |     |       |       |     |       |       |     |       |       |     |       |       |
|-----|-------|-------|-----|-------|-------|-----|-------|-------|-----|-------|-------|-----|-------|-------|
| 27C | -0.26 | -0.13 | 27C | -0.21 | -0.08 | 27C | -0.22 | -0.09 | 27C | -0.19 | -0.09 | 27C | -0.19 | -0.09 |
| 28H | 0.22  | 0.10  | 28H | 0.22  | 0.11  |
| 29C | 0.19  | 0.04  | 29C | 0.16  | -0.01 | 29C | 0.17  | 0.01  | 29C | 0.14  | 0.04  | 29C | 0.15  | 0.04  |
| 30H | 0.21  | 0.09  | 30H | 0.22  | 0.10  | 30H | 0.22  | 0.10  | 30H | 0.22  | 0.11  | 30H | 0.22  | 0.12  |
| 31H | 0.21  | 0.09  | 31H | 0.22  | 0.10  | 31H | 0.22  | 0.10  | 31H | 0.22  | 0.11  | 31H | 0.22  | 0.11  |
| 32C | -0.35 | -0.17 | 32C | -0.35 | -0.17 | 32C | -0.16 | -0.04 | 32C | -0.12 | -0.09 | 32C | -0.17 | -0.14 |
| 33H | 0.19  | 0.09  | 33H | 0.19  | 0.09  | 33C | -0.25 | -0.16 | 33C | -0.26 | -0.22 | 33C | -0.25 | -0.21 |
| 34H | 0.17  | 0.08  | 34H | 0.18  | 0.08  | 34S | 0.47  | 0.23  | 34S | 0.37  | 0.16  | 34S | 0.47  | 0.26  |
| 35H | 0.19  | 0.09  | 35H | 0.19  | 0.09  | 35C | -0.21 | -0.08 | 35C | -0.21 | -0.09 | 35C | -0.21 | -0.10 |
| 36C | -0.35 | -0.17 | 36C | -0.16 | -0.04 | 36H | 0.22  | 0.11  | 36H | 0.23  | 0.11  | 36H | 0.22  | 0.11  |
| 37H | 0.19  | 0.08  | 37C | -0.26 | -0.16 | 37C | -0.24 | -0.15 | 37C | -0.19 | -0.21 | 37C | -0.23 | -0.25 |
| 38H | 0.19  | 0.09  | 38S | 0.47  | 0.23  | 38H | 0.22  | 0.11  | 38H | 0.22  | 0.11  | 38H | 0.22  | 0.10  |
| 39H | 0.18  | 0.08  | 39C | -0.21 | -0.09 | 39C | -0.17 | -0.06 | 39C | -0.12 | 0.04  | 39C | -0.17 | -0.02 |
| 40C | -0.15 | -0.04 | 40H | 0.22  | 0.11  | 40C | -0.25 | -0.14 | 40C | -0.15 | -0.22 | 40C | -0.22 | -0.29 |
| 41C | -0.26 | -0.17 | 41C | -0.24 | -0.15 | 41S | 0.50  | 0.24  | 41S | 0.38  | 0.14  | 41S | 0.50  | 0.26  |
| 42S | 0.47  | 0.23  | 42H | 0.22  | 0.11  | 42C | 0.09  | 0.03  | 42C | 0.06  | -0.07 | 42C | 0.09  | -0.04 |
| 43C | -0.21 | -0.08 | 43C | -0.17 | -0.06 | 43N | -0.41 | -0.22 | 43N | -0.40 | -0.24 | 43N | -0.41 | -0.25 |
| 44H | 0.22  | 0.11  | 44C | -0.23 | -0.16 | 44C | 0.06  | 0.03  | 44C | 0.05  | 0.05  | 44C | 0.06  | 0.06  |
| 45C | -0.24 | -0.16 | 45S | 0.49  | 0.24  | 45C | 0.04  | 0.01  | 45C | 0.04  | -0.04 | 45C | 0.05  | -0.03 |
| 46H | 0.22  | 0.11  | 46C | 0.09  | 0.03  | 46N | -0.41 | -0.19 | 46N | -0.39 | -0.16 | 46N | -0.41 | -0.17 |
| 47C | -0.16 | -0.05 | 47N | -0.42 | -0.21 | 47H | 0.19  | 0.09  | 47H | 0.19  | 0.09  | 47H | 0.19  | 0.09  |
| 48C | -0.23 | -0.14 | 48C | 0.06  | 0.03  | 48H | 0.19  | 0.09  | 48H | 0.19  | 0.09  | 48H | 0.19  | 0.09  |
| 49S | 0.49  | 0.24  | 49C | 0.04  | 0.01  | 49C | 0.13  | 0.07  | 49C | 0.09  | 0.07  | 49C | 0.13  | 0.11  |
| 50C | 0.09  | 0.03  | 50N | -0.41 | -0.19 | 50C | -0.15 | -0.06 | 50C | -0.15 | 0.01  | 50C | -0.15 | 0.01  |
| 51N | -0.42 | -0.23 | 51H | 0.19  | 0.09  | 51H | 0.27  | 0.12  | 51H | 0.26  | 0.13  | 51H | 0.25  | 0.12  |
| 52C | 0.06  | 0.04  | 52H | 0.19  | 0.09  | 52C | -0.32 | -0.18 | 52C | -0.29 | -0.29 | 52C | -0.32 | -0.31 |
| 53C | 0.04  | 0.01  | 53C | 0.13  | 0.07  | 53H | 0.21  | 0.11  | 53H | 0.22  | 0.11  | 53H | 0.21  | 0.11  |
| 54N | -0.41 | -0.19 | 54C | -0.15 | -0.06 | 54C | 0.80  | 0.40  | 54C | 0.75  | 0.36  | 54C | 0.80  | 0.41  |
| 55H | 0.19  | 0.09  | 55H | 0.25  | 0.12  | 55O | -0.61 | -0.31 | 55O | -0.57 | -0.31 | 55O | -0.60 | -0.34 |
| 56H | 0.19  | 0.09  | 56C | -0.32 | -0.18 | 56O | -0.70 | -0.35 | 56O | -0.71 | -0.36 | 56O | -0.70 | -0.36 |
| 57C | 0.13  | 0.07  | 57H | 0.21  | 0.12  | 57H | 0.48  | 0.24  | 57H | 0.48  | 0.24  | 57H | 0.48  | 0.24  |
| 58C | -0.15 | -0.06 | 58C | 0.80  | 0.40  | 58N | -0.49 | -0.32 | 58N | -0.41 | -0.21 | 58N | -0.43 | -0.23 |
| 59H | 0.25  | 0.12  | 59O | -0.61 | -0.31 | 59N | -0.49 | -0.32 | 59C | 0.16  | 0.08  | 59C | 0.20  | 0.10  |
| 60C | -0.32 | -0.19 | 60O | -0.70 | -0.36 | 60C | 0.17  | 0.11  | 60C | 0.00  | 0.00  | 60C | 0.20  | 0.11  |
| 61H | 0.21  | 0.11  | 61H | 0.48  | 0.24  | 61C | -0.23 | -0.13 | 61C | -0.09 | -0.05 | 61C | -0.25 | -0.12 |

|     |       |       |     |       |       |     |       |       |     |       |       |     |       |       |
|-----|-------|-------|-----|-------|-------|-----|-------|-------|-----|-------|-------|-----|-------|-------|
| 62C | 0.80  | 0.40  | 62N | -0.49 | -0.34 | 62C | -0.23 | -0.13 | 62C | -0.24 | -0.12 | 62C | -0.08 | -0.05 |
| 63O | -0.61 | -0.31 | 63N | -0.46 | -0.29 | 63C | -0.18 | -0.09 | 63C | -0.28 | -0.15 | 63C | -0.25 | -0.13 |
| 64O | -0.70 | -0.35 | 64C | -0.35 | -0.17 | 64H | 0.22  | 0.11  | 64H | 0.21  | 0.11  | 64C | -0.08 | -0.05 |
| 65H | 0.48  | 0.24  | 65H | 0.19  | 0.09  | 65C | -0.18 | -0.09 | 65C | -0.18 | -0.10 | 65C | -0.18 | -0.09 |
| 66N | -0.46 | -0.31 | 66H | 0.19  | 0.09  | 66H | 0.22  | 0.11  | 66C | -0.20 | -0.11 | 66H | 0.22  | 0.11  |
| 67N | -0.46 | -0.31 | 67H | 0.18  | 0.08  | 67C | -0.22 | -0.13 | 67H | 0.21  | 0.11  | 67C | -0.17 | -0.09 |
| 68C | -0.35 | -0.17 | 68C | 0.18  | 0.11  | 68H | 0.21  | 0.09  | 68H | 0.22  | 0.11  | 68C | -0.18 | -0.09 |
| 69H | 0.19  | 0.09  | 69C | -0.24 | -0.14 | 69H | 0.21  | 0.09  | 69C | -0.22 | -0.12 | 69H | 0.22  | 0.11  |
| 70H | 0.19  | 0.09  | 70C | -0.24 | -0.13 | 70H | 0.21  | 0.09  | 70H | 0.21  | 0.10  | 70C | -0.17 | -0.09 |
| 71H | 0.17  | 0.08  | 71C | -0.18 | -0.09 | 71C | 0.17  | 0.11  | 71H | 0.20  | 0.09  | 71C | -0.23 | -0.12 |
| 72C | -0.35 | -0.17 | 72H | 0.22  | 0.12  | 72C | -0.23 | -0.13 | 72H | 0.20  | 0.09  | 72H | 0.20  | 0.10  |
| 73H | 0.19  | 0.09  | 73C | -0.19 | -0.09 | 73C | -0.23 | -0.13 | 73N | -0.41 | -0.21 | 73H | 0.21  | 0.10  |
| 74H | 0.19  | 0.09  | 74H | 0.22  | 0.11  | 74C | -0.19 | -0.09 | 74C | 0.16  | 0.08  | 74C | -0.23 | -0.12 |
| 75H | 0.18  | 0.08  | 75C | -0.23 | -0.14 | 75H | 0.22  | 0.11  | 75C | 0.00  | 0.0   | 75H | 0.20  | 0.09  |
|     |       |       | 76H | 0.21  | 0.09  | 76C | -0.18 | -0.09 | 76C | -0.09 | -0.05 | 76H | 0.21  | 0.10  |
|     |       |       | 77H | 0.21  | 0.09  | 77H | 0.22  | 0.11  | 77C | -0.24 | -0.12 | 77H | 0.20  | 0.09  |
|     |       |       | 78H | 0.21  | 0.09  | 78C | -0.22 | -0.13 | 78C | -0.28 | -0.18 | 78H | 0.20  | 0.09  |
|     |       |       | 79C | 0.18  | 0.11  | 79H | 0.21  | 0.09  | 79H | 0.21  | 0.11  | 79N | -0.43 | -0.21 |
|     |       |       | 80C | -0.24 | -0.14 | 80H | 0.21  | 0.09  | 80C | -0.19 | -0.09 | 80C | 0.20  | 0.10  |
|     |       |       | 81C | -0.24 | -0.13 | 81H | 0.21  | 0.09  | 81C | -0.20 | -0.11 | 81C | 0.20  | 0.10  |
|     |       |       | 82C | -0.19 | -0.09 | 82C | 0.17  | 0.11  | 82H | 0.22  | 0.11  | 82C | -0.25 | -0.12 |
|     |       |       | 83H | 0.22  | 0.11  | 83C | -0.23 | -0.13 | 83H | 0.22  | 0.11  | 83C | -0.08 | -0.04 |
|     |       |       | 84C | -0.18 | -0.09 | 84C | -0.23 | -0.13 | 84C | -0.22 | -0.12 | 84C | -0.25 | -0.12 |
|     |       |       | 85H | 0.22  | 0.11  | 85C | -0.18 | -0.09 | 85H | 0.21  | 0.10  | 85C | -0.09 | -0.04 |
|     |       |       | 86C | -0.23 | -0.14 | 86H | 0.22  | 0.11  | 86H | 0.20  | 0.09  | 86C | -0.19 | -0.09 |
|     |       |       | 87H | 0.20  | 0.09  | 87C | -0.19 | -0.09 | 87H | 0.20  | 0.09  | 87H | 0.22  | 0.11  |
|     |       |       | 88H | 0.20  | 0.09  | 88H | 0.22  | 0.11  | 88N | -0.49 | -0.36 | 88C | -0.17 | -0.09 |
|     |       |       | 89H | 0.20  | 0.09  | 89C | -0.22 | -0.13 |     |       |       | 89C | -0.18 | -0.09 |
|     |       |       |     |       |       | 90H | 0.21  | 0.10  |     |       |       | 90H | 0.22  | 0.11  |
|     |       |       |     |       |       | 91H | 0.21  | 0.10  |     |       |       | 91C | -0.17 | -0.09 |
|     |       |       |     |       |       | 92H | 0.21  | 0.10  |     |       |       | 92C | -0.23 | -0.12 |
|     |       |       |     |       |       | 93C | 0.17  | 0.11  |     |       |       | 93H | 0.20  | 0.09  |
|     |       |       |     |       |       | 94C | -0.23 | -0.13 |     |       |       | 94H | 0.21  | 0.10  |
|     |       |       |     |       |       | 95C | -0.24 | -0.13 |     |       |       | 95C | -0.23 | -0.12 |
|     |       |       |     |       |       | 96C | -0.19 | -0.09 |     |       |       | 96H | 0.20  | 0.09  |

|  |  |  |  |  |  |      |       |       |  |  |  |     |      |      |
|--|--|--|--|--|--|------|-------|-------|--|--|--|-----|------|------|
|  |  |  |  |  |  | 97H  | 0.22  | 0.11  |  |  |  | 97H | 0.21 | 0.10 |
|  |  |  |  |  |  | 98C  | -0.19 | -0.09 |  |  |  | 98H | 0.20 | 0.09 |
|  |  |  |  |  |  | 99H  | 0.22  | 0.11  |  |  |  | 99H | 0.20 | 0.09 |
|  |  |  |  |  |  | 100C | -0.22 | -0.13 |  |  |  |     |      |      |
|  |  |  |  |  |  | 101H | 0.21  | 0.10  |  |  |  |     |      |      |
|  |  |  |  |  |  | 102H | 0.21  | 0.10  |  |  |  |     |      |      |
|  |  |  |  |  |  | 103H | 0.21  | 0.10  |  |  |  |     |      |      |

<sup>a</sup> The calculated atomic charge represents for the isolated neutral dyes, which is employed for the complexes [dyeI]<sup>-</sup> and [dyeI]<sup>•</sup> formation. <sup>b</sup>  $f^+$  values also denotes the Fukui function calculated by  $f_k^+ = q_k(N+1) - q_k(N)$  for the nucleophilic attacks; where  $q_k(N+1)$  and  $q_k(N)$  are represents the electron density at atom k.

**Table S 4.** Calculated relative Gibbs free energies ( $\Delta G_{\text{rel}}$  in kcal/mol) and the corresponding NBO charges for the  $[\text{dyeI}]^-$ ,  $[\text{dyeI}]^\bullet$  and  $[\text{dyeI}_2]^\bullet$  intermediates complexes of the different donor groups of the designed sensitizers.

| Complexes                        | $\Delta G_{\text{rel}}$             |                                     |                                     | NBO Charge (I <sup>-</sup> )        |                                     |                                     |
|----------------------------------|-------------------------------------|-------------------------------------|-------------------------------------|-------------------------------------|-------------------------------------|-------------------------------------|
|                                  | $[\text{dyeI}]_{\text{A1}}^-$       | $[\text{dyeI}]_{\text{A2}}^-$       | $[\text{dyeI}]_{\text{A3}}^-$       | $[\text{dyeI}]_{\text{A1}}^-$       | $[\text{dyeI}]_{\text{A2}}^-$       | $[\text{dyeI}]_{\text{A3}}^-$       |
| $[\text{dye}_1\text{I}]^-$       | 0.0                                 | 0.23                                | 2.77                                | -0.961                              | -0.962                              | -0.959                              |
| $[\text{dye}_2\text{I}]^-$       | 4.51                                | 0.0                                 | 3.79                                | -0.958                              | -0.953                              | -0.958                              |
| $[\text{dye}_3\text{I}]^-$       | 2.51                                | 0.07                                | 0.00                                | -0.939                              | -0.948                              | -0.956                              |
| $[\text{dye}_4\text{I}]^-$       | 0.47                                | 1.14                                | 0.00                                | -0.945                              | -0.941                              | -0.951                              |
| $[\text{dye}_5\text{I}]^-$       | 0.89                                | 0.00                                | 1.77                                | -0.938                              | -0.944                              | -0.939                              |
| Complexes                        | $[\text{dyeI}]_{\text{B1}}^\bullet$ | $[\text{dyeI}]_{\text{B2}}^\bullet$ | $[\text{dyeI}]_{\text{B3}}^\bullet$ | $[\text{dyeI}]_{\text{B1}}^\bullet$ | $[\text{dyeI}]_{\text{B2}}^\bullet$ | $[\text{dyeI}]_{\text{B3}}^\bullet$ |
| $[\text{dye}_1\text{I}]^\bullet$ | 0.00                                | 1.38                                | 0.69                                | -0.562                              | -0.577                              | -0.573                              |
| $[\text{dye}_2\text{I}]^\bullet$ | 2.25                                | 2.28                                | 0.00                                | -0.508                              | -0.416                              | -0.501                              |
| $[\text{dye}_3\text{I}]^\bullet$ | 2.32                                | 4.17                                | 0.00                                | -0.352                              | -0.231                              | -0.358                              |
| $[\text{dye}_4\text{I}]^\bullet$ | 1.39                                | 0.00                                | 0.23                                | -0.113                              | -0.194                              | -0.109                              |

|                                                  |                                                  |                                                  |                                                  |                                                  |        |                                                  |        |                                                  |        |
|--------------------------------------------------|--------------------------------------------------|--------------------------------------------------|--------------------------------------------------|--------------------------------------------------|--------|--------------------------------------------------|--------|--------------------------------------------------|--------|
| [dye <sub>5</sub> I] <sup>•-</sup>               | 0.11                                             | 0.01                                             | 0.00                                             | -0.107                                           |        | -0.191                                           |        | -0.155                                           |        |
| Complexes                                        | [dyeI <sub>2</sub> ] <sup>•-</sup> <sub>C1</sub> | [dyeI <sub>2</sub> ] <sup>•-</sup> <sub>C2</sub> | [dyeI <sub>2</sub> ] <sup>•-</sup> <sub>C3</sub> | [dyeI <sub>2</sub> ] <sup>•-</sup> <sub>C1</sub> |        | [dyeI <sub>2</sub> ] <sup>•-</sup> <sub>C2</sub> |        | [dyeI <sub>2</sub> ] <sup>•-</sup> <sub>C3</sub> |        |
|                                                  |                                                  |                                                  |                                                  | I(1)                                             | I(2)   | I(1)                                             | I(2)   | I(1)                                             | I(2)   |
| [dye <sub>1</sub> I <sub>2</sub> ] <sup>•-</sup> | 0.00                                             | 1.15                                             | 0.92                                             | -0.489                                           | -0.489 | -0.486                                           | -0.486 | -0.493                                           | -0.483 |
| [dye <sub>2</sub> I <sub>2</sub> ] <sup>•-</sup> | 0.00                                             | 3.87                                             | 1.54                                             | -0.473                                           | -0.498 | -0.499                                           | -0.472 | -0.495                                           | -0.448 |
| [dye <sub>3</sub> I <sub>2</sub> ] <sup>•-</sup> | 0.00                                             | 2.14                                             | 2.07                                             | -0.484                                           | -0.484 | -0.462                                           | -0.501 | -0.497                                           | -0.466 |
| [dye <sub>4</sub> I <sub>2</sub> ] <sup>•-</sup> | 0.32                                             | 1.72                                             | 0.00                                             | -0.493                                           | -0.473 | -0.492                                           | -0.474 | -0.499                                           | -0.471 |
| [dye <sub>5</sub> I <sub>2</sub> ] <sup>•-</sup> | 0.00                                             | 0.04                                             | 0.09                                             | -0.483                                           | -0.483 | -0.493                                           | -0.472 | -0.501                                           | -0.468 |

The parenthesis values indicate I(1) for first and I(2) for the second iodide interactions. Dye1-dye5 represents the different donor substituents of the sensitizers.



**Table S 5.** Calculated absorption wavelength ( $\lambda$  in nm), oscillator strengths ( $f$  in a.u.), light harvesting efficiency (LHE), and the corresponding transitions assignments of the dye-iodide complexes.

| Complexes                                       | Transition States     | $\lambda$ | $f$  | LHE  | *Transition assignment                                                                                                                                     |
|-------------------------------------------------|-----------------------|-----------|------|------|------------------------------------------------------------------------------------------------------------------------------------------------------------|
| <b>dye1</b>                                     | $S_0 \rightarrow S_1$ | 518.5     | 0.85 | 0.86 | H-1 $\rightarrow$ L (54.2 %) H $\rightarrow$ L (38.8 %)                                                                                                    |
| [dye <sub>1</sub> I] <sup>•</sup> <sub>B1</sub> | $S_0 \rightarrow S_5$ | 591.2     | 0.17 | 0.32 | H-2 $\rightarrow$ L $\beta$ (42.7 %) H-5 $\rightarrow$ L $\beta$ (17.4 %) H $\rightarrow$ L $\beta$ (14.7 %)                                               |
|                                                 | $S_0 \rightarrow S_6$ | 527.8     | 0.37 | 0.57 | H $\rightarrow$ L $\alpha$ (17.9 %) H-1 $\rightarrow$ L $\alpha$ (20.7 %) H-1 $\rightarrow$ L+1 $\beta$ (15.6 %)                                           |
| [dye <sub>1</sub> I] <sup>•</sup> <sub>B2</sub> | $S_0 \rightarrow S_5$ | 621.1     | 0.28 | 0.48 | H-4 $\rightarrow$ L $\beta$ (47.1 %) H-5 $\rightarrow$ L $\beta$ (17.5 %) H-2 $\rightarrow$ L $\beta$ (13.5 %)                                             |
|                                                 | $S_0 \rightarrow S_6$ | 496.8     | 0.74 | 0.82 | H-1 $\rightarrow$ L $\alpha$ (26.1 %) H $\rightarrow$ L $\alpha$ (15.8 %)<br>H-2 $\rightarrow$ L+1 $\beta$ (23.3 %) H-3 $\rightarrow$ L+1 $\beta$ (11.8 %) |
| [dye <sub>1</sub> I] <sup>•</sup> <sub>B3</sub> | $S_0 \rightarrow S_5$ | 608.9     | 0.25 | 0.44 | H-4 $\rightarrow$ L $\beta$ (47.4 %) H-5 $\rightarrow$ L $\beta$ (17.6 %) H-2 $\rightarrow$ L $\beta$ (15.1 %)                                             |
|                                                 | $S_0 \rightarrow S_6$ | 494.0     | 0.76 | 0.83 | H-1 $\rightarrow$ L $\alpha$ (27.6 %) H $\rightarrow$ L $\alpha$ (16.2 %) H-2 $\rightarrow$ L+1 $\beta$ (28.9%)                                            |
| <b>dye2</b>                                     | $S_0 \rightarrow S_1$ | 507.6     | 0.84 | 0.85 | H-1 $\rightarrow$ L (41.3 %) H $\rightarrow$ L (33 %) H-2 $\rightarrow$ L (17.7 %)                                                                         |
| [dye <sub>2</sub> I] <sup>•</sup> <sub>B1</sub> | $S_0 \rightarrow S_5$ | 680.8     | 0.31 | 0.51 | H-4 $\rightarrow$ L $\beta$ (42.0 %) H-1 $\rightarrow$ L $\beta$ (30.7 %) H-5 $\rightarrow$ L $\beta$ (13.2 %)                                             |
|                                                 | $S_0 \rightarrow S_6$ | 498.2     | 0.83 | 0.85 | H-1 $\rightarrow$ L $\alpha$ (30.6 %) H $\rightarrow$ L $\alpha$ (12.0 %) H-1 $\rightarrow$ L+1 $\beta$ (84.9 %)                                           |
| [dye <sub>2</sub> I] <sup>•</sup> <sub>B2</sub> | $S_0 \rightarrow S_5$ | 581.4     | 0.25 | 0.44 | H-1 $\rightarrow$ L $\beta$ (70.4 %)                                                                                                                       |
|                                                 | $S_0 \rightarrow S_7$ | 497.7     | 0.59 | 0.74 | H $\rightarrow$ L $\alpha$ (19.1%) H-1 $\rightarrow$ L $\alpha$ (16.4%)<br>H-1 $\rightarrow$ L+1 $\beta$ (17.2%) H $\rightarrow$ L+1 $\beta$ (10.3 %)      |
| [dye <sub>2</sub> I] <sup>•</sup> <sub>B3</sub> | $S_0 \rightarrow S_5$ | 582.0     | 0.26 | 0.45 | H-1 $\rightarrow$ L $\beta$ (52.1 %) H-2 $\rightarrow$ L $\beta$ (30.3 %)                                                                                  |
|                                                 | $S_0 \rightarrow S_6$ | 500.3     | 0.59 | 0.74 | H-2 $\rightarrow$ L $\beta$ (24.1%) H-5 $\rightarrow$ L $\beta$ (21.9%) H-1 $\rightarrow$ L+1 $\beta$ (13.6 %)<br>H-1 $\rightarrow$ L $\alpha$ (15.8%)     |
| <b>dye3</b>                                     | $S_0 \rightarrow S_1$ | 516.4     | 0.92 | 0.88 | H-2 $\rightarrow$ L (64.7 %) H $\rightarrow$ L (26.9 %)                                                                                                    |
| [dye <sub>3</sub> I] <sup>•</sup> <sub>B1</sub> | $S_0 \rightarrow S_6$ | 599.0     | 0.48 | 0.67 | H-5 $\rightarrow$ L $\beta$ (42.0 %) H-4 $\rightarrow$ L $\beta$ (35.4 %)                                                                                  |
|                                                 | $S_0 \rightarrow S_7$ | 483.6     | 0.63 | 0.76 | H-5 $\rightarrow$ L $\alpha$ (25.1 %) H-4 $\rightarrow$ L $\alpha$ (11.2 %) H-4 $\rightarrow$ L+1 $\beta$ (33.1%)                                          |
| [dye <sub>3</sub> I] <sup>•</sup> <sub>B2</sub> | $S_0 \rightarrow S_6$ | 546.4     | 0.42 | 0.62 | H-5 $\rightarrow$ L $\beta$ (35.1%) H-4 $\rightarrow$ L $\beta$ (28.4 %)                                                                                   |
|                                                 | $S_0 \rightarrow S_7$ | 491.9     | 0.47 | 0.66 | H-3 $\rightarrow$ L $\alpha$ (93.1 %) H-4 $\rightarrow$ L+1 $\beta$ (14.6%)                                                                                |

|                                                 |                                |       |      |      |                                                                      |
|-------------------------------------------------|--------------------------------|-------|------|------|----------------------------------------------------------------------|
| [dye <sub>3</sub> I] <sup>•</sup> <sub>B3</sub> | S <sub>0</sub> →S <sub>5</sub> | 582.1 | 0.23 | 0.41 | H-2→Lβ (73.9 %)                                                      |
|                                                 | S <sub>0</sub> →S <sub>7</sub> | 497.9 | 0.70 | 0.80 | H-1→Lα (25.0 %) H→Lα (17.3 %) H-2→L+1β (25.7%)                       |
| <b>dye4</b>                                     | S <sub>0</sub> →S <sub>1</sub> | 494.0 | 0.81 | 0.84 | H → L (49.8 %) H-1→ L (40.4 %)                                       |
| [dye <sub>4</sub> I] <sup>•</sup> <sub>B1</sub> | S <sub>0</sub> →S <sub>5</sub> | 758.6 | 0.04 | 0.10 | H-3→Lβ (48.0 %) H-2→ Lβ(34.9 %)                                      |
|                                                 | S <sub>0</sub> →S <sub>7</sub> | 491.8 | 0.82 | 0.85 | H→Lα (24.7%) H→L+1α (23.5 %)<br>H-1→L+1β (19.8 %)H-1→L+1 β (18.8%)   |
| [dye <sub>4</sub> I] <sup>•</sup> <sub>B2</sub> | S <sub>0</sub> →S <sub>6</sub> | 529.7 | 0.07 | 0.15 | H→Lβ (51.7 %) H-5→Lβ (16.1 %) H-3→ Lβ (15.8 %)                       |
|                                                 | S <sub>0</sub> →S <sub>7</sub> | 493.6 | 0.77 | 0.83 | H→L α (29.2 %) H-1→L α (16.0 %)<br>H→L+1β (29.2%) H-1→L+1β (15.6 %)  |
| [dye <sub>4</sub> I] <sup>•</sup> <sub>B3</sub> | S <sub>0</sub> →S <sub>5</sub> | 753.1 | 0.04 | 0.09 | H-3→L β (45.2 %) H-2→ L β (33.1 %)                                   |
|                                                 | S <sub>0</sub> →S <sub>7</sub> | 492.9 | 0.42 | 0.62 | H-1→L β (24.8%) H-0→L+1 β (13.6%)H-0→L+0 α (13.0 %)                  |
| <b>dye5</b>                                     | S <sub>0</sub> →S <sub>1</sub> | 484.4 | 0.82 | 0.85 | H → L (52.6 %) H-1→ L (35.2 %)                                       |
| [dye <sub>5</sub> I] <sup>•</sup> <sub>B1</sub> | S <sub>0</sub> →S <sub>7</sub> | 510.7 | 0.03 | 0.07 | H-1→Lβ (42.9 %) H-2→ Lβ (26.2 %) H-5→L β (10.7%)                     |
|                                                 | S <sub>0</sub> →S <sub>8</sub> | 491.2 | 0.81 | 0.84 | H →L α (22.1%) H-1→L α (20.1%)<br>H-1→L+1 β (21.2 %)H →L+1 β (21.1%) |
| [dye <sub>5</sub> I] <sup>•</sup> <sub>B2</sub> | S <sub>0</sub> →S <sub>5</sub> | 544.1 | 0.23 | 0.41 | H-1→L β (61.6 %) H-7→ L β (12.5 %)                                   |
|                                                 | S <sub>0</sub> →S <sub>6</sub> | 491.2 | 0.68 | 0.79 | H →L α (32.0 %) H →L+1 β (26.3 %) H-1→L+1 β (10.7 %)                 |
| [dye <sub>5</sub> I] <sup>•</sup> <sub>B3</sub> | S <sub>0</sub> →S <sub>6</sub> | 553.4 | 0.05 | 0.11 | H-4→ Lα (29.5 %) H→L β (58.5 %)                                      |
|                                                 | S <sub>0</sub> →S <sub>7</sub> | 492.9 | 0.78 | 0.83 | H→L α (28.8 %) H-1→L α (14.5 %)<br>H→L+1β (28.9%) H-1→L+1 β (14.1 %) |

Labeling B1, B2 and B3 denotes the three stable interaction sites of the [dyeI<sub>2</sub>]<sup>•</sup> complexes. <sup>a</sup> H = HOMO and L = LUMO. **dye<sub>1</sub>-dye<sub>5</sub>** denotes the different donor groups of the designed sensitizers.

**Table S 6.** Calculated absorption wavelength ( $\lambda$  in nm), oscillator strengths ( $f$  in a.u.), light harvesting efficiency (LHE), and the corresponding electronic transition of the dye-iodide  $[\text{dyeI}_2]^-$  complexes for all the designed sensitizers.

| Complexes                                | States                | $\lambda$ | $f$  | LHE  | <sup>a</sup> Electronic Transition                                                                                                                      |
|------------------------------------------|-----------------------|-----------|------|------|---------------------------------------------------------------------------------------------------------------------------------------------------------|
| <b>dye1</b>                              | $S_0 \rightarrow S_1$ | 518.5     | 0.85 | 0.86 | H-1 $\rightarrow$ L(54.2 %) H $\rightarrow$ L(38.8 %)                                                                                                   |
| $[\text{dye}_1\text{I}_2]^-_{\text{c1}}$ | $S_0 \rightarrow S_6$ | 614.8     | 0.98 | 0.90 | H-5 $\rightarrow$ L $\alpha$ (26.5 %) H $\rightarrow$ L $\alpha$ (11.4 %) H $\rightarrow$ L $\beta$ (26.8 %)                                            |
|                                          | $S_0 \rightarrow S_8$ | 456.7     | 0.25 | 0.44 | H-7 $\rightarrow$ L $\beta$ (35.4 %) H-6 $\rightarrow$ L $\beta$ (30.8 %) H-1 $\rightarrow$ L $\beta$ (20.7 %)                                          |
| $[\text{dye}_1\text{I}_2]^-_{\text{c2}}$ | $S_0 \rightarrow S_6$ | 586.6     | 0.87 | 0.86 | H-4 $\rightarrow$ L $\alpha$ (15.6 %) H-1 $\rightarrow$ L $\alpha$ (13.2 %) H $\rightarrow$ L $\beta$ (22.2 %)                                          |
|                                          | $S_0 \rightarrow S_8$ | 463.0     | 0.42 | 0.62 | H-7 $\rightarrow$ L $\beta$ (40.9 %) H-4 $\rightarrow$ L $\beta$ (21.3 %) H-5 $\rightarrow$ L $\beta$ (11.0 %)                                          |
| $[\text{dye}_1\text{I}_2]^-_{\text{c3}}$ | $S_0 \rightarrow S_6$ | 540.4     | 0.77 | 0.83 | H-4 $\rightarrow$ L $\alpha$ (18.3 %) H-1 $\rightarrow$ L $\alpha$ (16.8 %) H $\rightarrow$ L $\beta$ (20.7 %)                                          |
|                                          | $S_0 \rightarrow S_9$ | 461.6     | 0.70 | 0.80 | H-7 $\rightarrow$ L $\beta$ (37.7 %) H-4 $\rightarrow$ L $\beta$ (21.8 %) H-8 $\rightarrow$ L $\beta$ (12.6 %)                                          |
| <b>dye2</b>                              | $S_0 \rightarrow S_1$ | 507.6     | 0.84 | 0.85 | H-1 $\rightarrow$ L (41.3 %) H $\rightarrow$ L(33 %) H-2 $\rightarrow$ L (17.7 %)                                                                       |
| $[\text{dye}_2\text{I}_2]^-_{\text{c1}}$ | $S_0 \rightarrow S_6$ | 576.1     | 0.99 | 0.90 | H-5 $\rightarrow$ L $\alpha$ (15.1 %) H $\rightarrow$ L $\alpha$ (13.1 %)<br>H $\rightarrow$ L $\beta$ (19.7 %) H-7 $\rightarrow$ L $\beta$ (15.3 %)    |
|                                          | $S_0 \rightarrow S_8$ | 450.8     | 0.33 | 0.53 | H-6 $\rightarrow$ L+1 $\beta$ (84.9 %)                                                                                                                  |
| $[\text{dye}_2\text{I}_2]^-_{\text{c2}}$ | $S_0 \rightarrow S_6$ | 550.2     | 0.87 | 0.86 | H-4 $\rightarrow$ L $\alpha$ (18.0 %) H-1 $\rightarrow$ L $\alpha$ (11.4%) H-1 $\rightarrow$ L $\alpha$ (10.6%)<br>H-7 $\rightarrow$ L $\beta$ (22.0 %) |
|                                          | $S_0 \rightarrow S_8$ | 457.5     | 0.44 | 0.64 | H-6 $\rightarrow$ L+1 $\beta$ (78.2%) H-4 $\rightarrow$ L+1 $\beta$ (10.3 %)                                                                            |
| $[\text{dye}_2\text{I}_2]^-_{\text{c3}}$ | $S_0 \rightarrow S_6$ | 561.4     | 0.86 | 0.86 | H-5 $\rightarrow$ L $\alpha$ (20.1 %)<br>H $\rightarrow$ L $\beta$ (16.9 %) H-6 $\rightarrow$ L $\beta$ (10.2%) H-7 $\rightarrow$ L $\beta$ (10.1%)     |
|                                          | $S_0 \rightarrow S_8$ | 453.9     | 0.34 | 0.54 | H-7 $\rightarrow$ L+1 $\beta$ (37.2%) H-6 $\rightarrow$ L+1 $\beta$ (34.6 %) H-5 $\rightarrow$ L+1 $\beta$ (23.2 %)                                     |
| <b>dye3</b>                              | $S_0 \rightarrow S_1$ | 516.4     | 0.92 | 0.88 | H-2 $\rightarrow$ L (64.7 %) H $\rightarrow$ L(26.9 %)                                                                                                  |
| $[\text{dye}_3\text{I}_2]^-_{\text{c1}}$ | $S_0 \rightarrow S_6$ | 564.6     | 1.03 | 0.91 | H-1 $\rightarrow$ L $\alpha$ (15.8 %) H-7 $\rightarrow$ L $\beta$ (20.8 %) H $\rightarrow$ L $\beta$ (15.6%)                                            |
|                                          | $S_0 \rightarrow S_8$ | 461.6     | 0.42 | 0.62 | H-7 $\rightarrow$ L+1 $\beta$ (79.4 %)                                                                                                                  |
| $[\text{dye}_3\text{I}_2]^-_{\text{c2}}$ | $S_0 \rightarrow S_6$ | 557.5     | 0.94 | 0.88 | H-1 $\rightarrow$ L $\alpha$ (18.4 %) H $\rightarrow$ L $\beta$ (18.4 %) H-8 $\rightarrow$ L $\beta$ (14.6%)                                            |
|                                          | $S_0 \rightarrow S_8$ | 457.4     | 0.35 | 0.55 | H-7 $\rightarrow$ L+1 $\beta$ (93.1%)                                                                                                                   |

|                                                                |                                |       |      |      |                                                                          |
|----------------------------------------------------------------|--------------------------------|-------|------|------|--------------------------------------------------------------------------|
| [dye <sub>3</sub> I <sub>2</sub> ] <sup>-</sup> c <sub>3</sub> | S <sub>0</sub> →S <sub>6</sub> | 557.4 | 1.03 | 0.91 | H-1→Lα(15.8 %) H-7→Lβ(20.9 %) H→Lβ(15.5%)                                |
|                                                                | S <sub>0</sub> →S <sub>8</sub> | 454.0 | 0.42 | 0.62 | H-6→L+1β(82.4 %)                                                         |
| <b>dye4</b>                                                    | S <sub>0</sub> →S <sub>1</sub> | 494.0 | 0.81 | 0.84 | H → L(49.8 %) H-1 → L(40.4 %)                                            |
| [dye <sub>4</sub> I <sub>2</sub> ] <sup>-</sup> c <sub>1</sub> | S <sub>0</sub> →S <sub>6</sub> | 541.1 | 0.96 | 0.89 | H-1→Lα(17.2 %) H-7→Lβ(11.9 %) H-6→Lβ(10.8%)                              |
|                                                                | S <sub>0</sub> →S <sub>8</sub> | 465.5 | 0.33 | 0.53 | H-5→L+1β(69.3 %) H-4→L+1β(19.2%)                                         |
| [dye <sub>4</sub> I <sub>2</sub> ] <sup>-</sup> c <sub>2</sub> | S <sub>0</sub> →S <sub>6</sub> | 546.0 | 0.84 | 0.85 | H-1→Lα(16.7 %) H-4→Lα(12.1%) H-2→Lβ(25.9 %)                              |
|                                                                | S <sub>0</sub> →S <sub>8</sub> | 460.7 | 0.48 | 0.67 | H-5→L+1β(71.3 %) H-7→L+1β(16.0%)                                         |
| [dye <sub>4</sub> I <sub>2</sub> ] <sup>-</sup> c <sub>3</sub> | S <sub>0</sub> →S <sub>6</sub> | 517.6 | 0.88 | 0.87 | H-1→Lα (19.4 %) H-4→Lα (16.6 %)                                          |
|                                                                | S <sub>0</sub> →S <sub>8</sub> | 449.6 | 0.35 | 0.55 | H→L β (11.4%) H-3→L β (10.7%)<br>H-6→L+1 β (90.7 %)                      |
| <b>dye5</b>                                                    | S <sub>0</sub> →S <sub>1</sub> | 484.4 | 0.82 | 0.85 | H → L (52.6 %) H-1 → L (35.2 %)                                          |
| [dye <sub>5</sub> I <sub>2</sub> ] <sup>-</sup> c <sub>1</sub> | S <sub>0</sub> →S <sub>6</sub> | 536.6 | 0.93 | 0.88 | H-10→Lα (19.1 %) H-1→L α (14.4%) H-5→L α (13.5%)                         |
|                                                                | S <sub>0</sub> →S <sub>8</sub> | 446.9 | 0.33 | 0.53 | H-10→L β (19.1 %)<br>H-7→L+1 β (90.2 %)                                  |
| [dye <sub>5</sub> I <sub>2</sub> ] <sup>-</sup> c <sub>2</sub> | S <sub>0</sub> →S <sub>6</sub> | 536.0 | 0.87 | 0.86 | H-1→Lα (15.3 %) H-5→Lα (13.4 %)                                          |
|                                                                | S <sub>0</sub> →S <sub>8</sub> | 458.3 | 0.39 | 0.59 | H-7→L β (13.0 %) H-9→L β (11.8 %)<br>H-6→L+1 β (78.2 %)                  |
| [dye <sub>5</sub> I <sub>2</sub> ] <sup>-</sup> c <sub>3</sub> | S <sub>0</sub> →S <sub>6</sub> | 538.9 | 0.82 | 0.85 | H-1→Lα (18.6 %) H-4→Lα (17.6 %)                                          |
|                                                                | S <sub>0</sub> →S <sub>8</sub> | 447.7 | 0.34 | 0.54 | H-3→L β (16.5%) H-3→L β (10.7%)<br>H-6→L+1 β (74.5 %) H-5→L+1 β (17.5 %) |

Labeling C1, C2 and C3 represents the three most stable interaction sites of the [dyeI<sub>2</sub>]<sup>-</sup> complexes. <sup>a</sup> H = HOMO and L = LUMO. **dye<sub>1</sub>-dye<sub>5</sub>** denotes the different donor groups of the designed sensitizers.

## References

1. Y. M. Hailu, W.-R. Shie, S. Nachimuthu and J.-C. Jiang, *ACS Sustainable Chem. Eng.*, 2017, 5, 8619-8629.
2. V. T. T. Huong, T. B. Tai and M. T. Nguyen, *J. Phys. Chem. A*, 2014, 118, 3335-3343.
3. G. R. Hutchison, M. A. Ratner and T. J. Marks, *J. Am. Chem. Soc.*, 2005, 127, 2339-2350.
4. L. E. Roy, E. Jakubikova, M. G. Guthrie and E. R. Batista, *J. Phys. Chem. A*, 2009, 113, 6745-6750.
5. D. P. Hagberg, T. Marinado, K. M. Karlsson, K. Nonomura, P. Qin, G. Boschloo, T. Brinck, A. Hagfeldt and L. Sun, *J. Org. Chem.*, 2007, 72, 9550-9556.
6. T. Khanasa, N. Jantasing, S. Morada, N. Leesakul, R. Tarsang, S. Namuangruk, T. Kaewin, S. Jungsuttiwong, T. Sudyoasuk and V. Promarak, *Eur. J. Org. Chem.*, 2013, 13, 2608-2620.
